# Supplementary material for: Demographic, clinical guideline criteria, Medicaid expansion and state of residency: a multilevel analysis of PrEP use on a large US sample
Source: PubMed Central journal article supplement — BMJ Open. 2022 Feb 2;12(2):e055487. doi: 10.1136/bmjopen-2021-055487 (PMC8811583; doi:10.1136/bmjopen-2021-055487), 2022-02-02
Supplement: bmjopen-2021-055487.draft_revisions.pdf [file bmjopen-2021-055487.draft_revisions.pdf]

# BMJ Open

BMJ Open is committed to open peer review. As part of this commitment we make the peer review history of every article we publish publicly available.

When an article is published we post the peer reviewers' comments and the authors' responses online. We also post the versions of the paper that were used during peer review. These are the versions that the peer review comments apply to.

The versions of the paper that follow are the versions that were submitted during the peer review process. They are not the versions of record or the final published versions. They should not be cited or distributed as the published version of this manuscript.

BMJ Open is an open access journal and the full, final, typeset and author-corrected version of record of the manuscript is available on our site with no access controls, subscription charges or pay-per-view fees (<http://bmjopen.bmj.com>).

If you have any questions on BMJ Open's open peer review process please email [info.bmjopen@bmj.com](mailto:info.bmjopen@bmj.com)

# BMJ Open

## Demographic, Clinical Guideline Criteria, Medicaid Expansion and State of Residency: A Multilevel Analysis of PrEP use on a Large US Sample

|                               |                                                                                                                                                                                                                                                                                                                                                           |
|-------------------------------|-----------------------------------------------------------------------------------------------------------------------------------------------------------------------------------------------------------------------------------------------------------------------------------------------------------------------------------------------------------|
| Journal:                      | <i>BMJ Open</i>                                                                                                                                                                                                                                                                                                                                           |
| Manuscript ID                 | bmjopen-2021-055487                                                                                                                                                                                                                                                                                                                                       |
| Article Type:                 | Original research                                                                                                                                                                                                                                                                                                                                         |
| Date Submitted by the Author: | 15-Jul-2021                                                                                                                                                                                                                                                                                                                                               |
| Complete List of Authors:     | Carneiro, Pedro; CUNY School of Public Health, Community Health and Health Policy<br>Mirzayi, Chloe; City University of New York; City University of New York, Department of Epidemiology and Biostatistics<br>Jones, Scott; Hunter College, Pride Research Consortium<br>Rendina, Jonathon; Hunter College, Pride Research Consortium<br>Grov, Christian |
| Keywords:                     | PREVENTIVE MEDICINE, Public health < INFECTIOUS DISEASES, HIV & AIDS < INFECTIOUS DISEASES, Epidemiology < INFECTIOUS DISEASES                                                                                                                                                                                                                            |
|                               |                                                                                                                                                                                                                                                                                                                                                           |

SCHOLARONE™  
Manuscripts

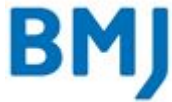

I, the Submitting Author has the right to grant and does grant on behalf of all authors of the Work (as defined in the below author licence), an exclusive licence and/or a non-exclusive licence for contributions from authors who are: i) UK Crown employees; ii) where BMJ has agreed a CC-BY licence shall apply, and/or iii) in accordance with the terms applicable for US Federal Government officers or employees acting as part of their official duties; on a worldwide, perpetual, irrevocable, royalty-free basis to BMJ Publishing Group Ltd ("BMJ") its licensees and where the relevant Journal is co-owned by BMJ to the co-owners of the Journal, to publish the Work in this journal and any other BMJ products and to exploit all rights, as set out in our [licence](#).

The Submitting Author accepts and understands that any supply made under these terms is made by BMJ to the Submitting Author unless you are acting as an employee on behalf of your employer or a postgraduate student of an affiliated institution which is paying any applicable article publishing charge ("APC") for Open Access articles. Where the Submitting Author wishes to make the Work available on an Open Access basis (and intends to pay the relevant APC), the terms of reuse of such Open Access shall be governed by a Creative Commons licence – details of these licences and which [Creative Commons](#) licence will apply to this Work are set out in our licence referred to above.

Other than as permitted in any relevant BMJ Author's Self Archiving Policies, I confirm this Work has not been accepted for publication elsewhere, is not being considered for publication elsewhere and does not duplicate material already published. I confirm all authors consent to publication of this Work and authorise the granting of this licence.

1  
2  
3 **Demographic, Clinical Guideline Criteria, Medicaid Expansion and State of Residency: A**  
4  
5 **Multilevel Analysis of PrEP use on a Large US Sample**  
6

7 Pedro B. Carneiro<sup>1</sup>, Chloe Mirzayi<sup>2</sup>, Scott Jones<sup>3</sup>, H. Jonathon Rendina<sup>3,4</sup>, Christian Grov<sup>1,2</sup>  
8  
9

10 1. Department of Community Health and Health Policy, CUNY Graduate School of Public Health  
11 and Health Policy, New York, NY  
12

13 2. CUNY Institute for Implementation Science in Population Health, New York, NY  
14

15 3. PRIDE Health Research Consortium, New York, NY  
16

17 4. Department of Psychology, Hunter College, CUNY, NY  
18  
19  
20  
21

22 **Corresponding author:** Pedro B Carneiro, MPH. Graduate Student. CUNY Graduate School of  
23 Public Health and Health Policy 55 W. 125th St., 7<sup>th</sup> Floor mailroom (c/o: Dr. C Grov). New  
24 York, NY 10027, USA. E-mail: [pedro.carneiro74@sphmail.cuny.edu](mailto:pedro.carneiro74@sphmail.cuny.edu)  
25  
26  
27  
28  
29  
30  
31

32 **Main manuscript word count:** 3202 words  
33  
34  
35  
36  
37

38 **Keywords:** PrEP uptake, biomedical prevention, multilevel analysis, health disparities, HIV  
39 prevention  
40  
41  
42  
43  
44  
45  
46  
47  
48  
49  
50  
51  
52  
53  
54  
55  
56  
57  
58  
59  
60

## Abstract

**Objective:** To explore the association of clinical guideline-related variables, demographics and Medicaid expansion on PrEP uptake in one of the largest US sample of MSM and TGNB people ever analyzed.

**Methods:** We analyzed predictors of current PrEP use using demographic and HIV risk-related variables (level-1), as well as state-level variables (level-2) (i.e, Medicaid Expansion status). We further explored the role state of residence plays in PrEP uptake disparities across the US.

**Results:** We found that the odds of PrEP use were significantly greater in older age, white, cisgender men. Moreover, individuals who reported recent PEP use, a recent sexually transmitted infection diagnosis and recent drug use were significantly more likely to report PrEP use. Lastly, we found **that** the median odds of PrEP use between similar individuals from different states were 1.40 for the ones living in the Medicaid expansion states, compared to those not living in Medicaid expansion states. State of residence did not play a significant role in explaining PrEP disparities overall.

**Conclusion:** Our analysis showed that PrEP use is less common in communities standing to benefit the most from it – young MSM and TGNB of color. However, individuals meeting federal guidelines for PrEP were significantly more likely to use PrEP. Though we found a positive association between living in Medicaid expansion states and PrEP use; that variable, as well as one's state of residency, were not suitable to explain variations in PrEP use in the US.

## Article summary

### Strengths and limitations of this study

1. This study reports on patient-level risk factors of PrEP use in a sample of over 6,000 cisgender men and transgender people who have sex with men across the United States, representing all states.
2. This study uses multi-level modelling analysis to understand the role of state-level predictors alongside individual-level predictors of PrEP use.
3. This study includes the magnitude of clinical guidelines criteria predictors of PrEP use in a US national sample, and the role of Medicaid Expansion on PrEP use.
4. This study was conducted in 2017 and 2018, and the implementation of PrEP across the United States is ever growing and changing.
5. The study uses self-reported cross-sectional data, and causal inference cannot be drawn from the analysis

## Introduction

In 2012, the US Food and Drug Administration (FDA) approved the first daily HIV preexposure prophylactic (PrEP) medication in the form of tenofovir disoproxil fumarate and emtricitabine (TDF/FTC).<sup>1</sup> The efficacy of PrEP is unmatched, providing near-universal (i.e., 99%) protection against HIV with proper adherence.<sup>2-4</sup> Following its approval, the CDC estimated that as many as 1.2 million Americans would benefit from taking the regimen.<sup>6</sup> In 2017, the first official analysis of PrEP data in the United States was published, identifying approximately 80,000 prescriptions filled by unique HIV-negative users by the end of 2016.<sup>7</sup> The number represents one-fifth of all estimated candidates and about one-quarter of all eligible men who have sex with men (MSM)<sup>6</sup> – these numbers haven't been updated since, and there is little indication they have significantly improved.

Recent estimations of PrEP use in the general population suggest that as many as 200,000 individuals have initiated PrEP since the 2012 FDA approval through 2020,<sup>8</sup> a number still lower than expected.<sup>6</sup> To add complexity to the issue, these numbers represent initiations-only and, for PrEP to be effective, users also need to stay engaged and persist. Researchers in the US have reported PrEP discontinuation rates of up to 60% following six-months of initiation.<sup>9-12</sup> An analysis of persistence (i.e., continuous use) data using prescription drug records in the US from 2012-2017 found that PrEP persistence was only 14-months on average, and significantly differed by race, age group and insurance status.<sup>13</sup> Understanding this issue is critical for communities at-risk for HIV, especially Black and Latinx MSM communities. Racial disparities in HIV outcomes are alarming in magnitude in the US with a recent report from the CDC estimating that Black MSM have a 1 in 2 chance of lifetime seroconversion, while Latinos have a 1 in 4.<sup>16</sup> There is an immediate need to develop solutions to mitigate both issues - the overall

1  
2  
3 uptake and persistence in PrEP, and the observed racial disparity in communities standing to  
4 benefit the most from it.  
5  
6

7  
8 A prominent issue impacting PrEP uptake in the US is coverage, both financial coverage  
9  
10 in the form of health insurance, and geographic coverage in the form of access to a provider who  
11 is competent and accepts your medical coverage. Issues related to having health insurance  
12 coverage or being able to afford costs associated with medical care are widely reported  
13  
14 throughout the PrEP literature,<sup>17-20</sup> and they relate to an individual inability to pay for costs  
15 associated with taking PrEP. However, financial coverage is also managed at the state-level,  
16  
17 through state-run Medicaid programs and drug assistance programs (DAP), which grant some  
18 access and affordability to PrEP. Patients enrolled in Medicaid have mixed levels of PrEP access,  
19  
20 with enrollees with incomes under 150% of the federal poverty level (FPL) receiving PrEP for  
21 nearly free due to federal laws limiting costs.<sup>21</sup> In 2010, the affordable care act (ACA) provided  
22 states with the ability to expand Medicaid programs to adults aged 65 and younger with incomes  
23  
24 138% of the FPL (about \$17,000 a year) and below.<sup>21</sup> Several states have chosen to expand  
25  
26 Medicaid, and reports have linked increases in PrEP use to these expansions,<sup>23-25</sup> suggesting that  
27 state variation in PrEP use may explain some of the disparities observed in the population at-  
28  
29 large. Thus far, the issue of Medicaid expansion has only been explored on the aggregate level,  
30  
31 limiting studies to measures of association which only informs on effect size but not on the  
32  
33 impact of the variable on the distribution of PrEP across communities. Understanding the impact  
34  
35 of Medicaid expansion on a population-level can support a better understanding of the  
36  
37 complexities in regional disparities in PrEP use, for example, by exploring the association of  
38  
39 Medicaid expansion and racial disparities in PrEP uptake. Furthermore, it seems imperative to  
40  
41  
42  
43  
44  
45  
46  
47  
48  
49  
50  
51  
52  
53  
54  
55  
56  
57  
58  
59  
60



1  
2  
3 understand whether the state of residency of a particular individual is significant to explain PrEP  
4 uptake.  
5  
6

7  
8 Another limitation of current PrEP use reports in the US is their reliance on pharmacy  
9 claims data,<sup>7</sup> or multiple different sources to obtain estimates,<sup>8</sup> limiting one's ability to account  
10 for confounding variables, like HIV-related risk factors. They also limit a deeper exploration of  
11 complex questions by limiting the study unit to a prescription claim, for example, rather than one  
12 individual. Though an objective clinical guidance is in place to assess PrEP eligibility, the units  
13 of analysis used thus far have been unable to be used to explore the association of these and PrEP  
14 uptake. Using the combined the screening/enrollment data from two similar-in-scope U.S.  
15 national cohorts, we created one of the largest national samples of MSM and transgender and  
16 gender non-binary (TGNB) individuals who have sex with men. Using a mixed-effect multilevel  
17 logistic analysis (MLA) approach, we analyzed predictors of current PrEP use using  
18 demographic and HIV risk-related variables (level-1), as well as state-level variables (level-2)  
19 (i.e, Medicaid Expansion status).  
20  
21  
22  
23  
24  
25  
26  
27  
28  
29  
30  
31  
32  
33  
34

## 35 **Methods**

### 36 **About the studies**

37  
38 The *Together 5,000* and *UNITE* studies are both U.S. national cohorts longitudinally  
39 following sexual and gender minorities at-risk for HIV. Both cohorts are similar in scope,  
40 exploring sexual behavior and PrEP uptake. Details on both studies have been described  
41 elsewhere.<sup>26, 27</sup> Briefly, each used advertisements on geospatial sexual networking apps to recruit  
42 MSM and TGNB people who have sex with men across the U.S. to enroll in longitudinal  
43 assessments. During each study's enrollment phase, app-users were presented with an ad for the  
44 study. Those interested were directed to a brief screening (i.e., eligibility) survey on their devices  
45  
46  
47  
48  
49  
50  
51  
52  
53  
54  
55  
56  
57  
58  
59  
60

1  
2  
3 browser. The present analysis utilizes the reconciled screening data from each study dataset (i.e.,  
4 all variables that were identical across both screening surveys). Both studies enrolled samples in  
5  
6 2017 and 2018.  
7  
8

9  
10 The sample's composition, which was not designed to be nationally representative, is  
11 nonetheless one of the largest national surveys of sexual minorities, consisting of 157,035  
12 responses, with 27% of the responses being from the *Together 5,000* study and the remainder  
13 from *UNITE*. Our current analysis, exploring individual- and state-level predictors of current  
14 PrEP use, was limited to individuals not living with HIV, and those residing in one of the 50  
15 states, Washington, DC, or Puerto Rico – hereby referred to as “states.” Our decision to limit the  
16 analytical sample to these states was based on state-level data availability. Our final sample was  
17 inclusive of 123,905 (79%) cisgender men and TGNB people who have sex with men.  
18  
19

### 20 21 22 **Individual-level variables (level-1)** 23

24  
25 **Demographics.** Participants were grouped according to their age (under 18 years old, 18-  
26 24 years old, 25-29 years old, 30-49 years old, 50+ years old), gender identity (male, female  
27 (assigned male at birth), transgender person, something else), and race/ethnicity (Black, Latinx,  
28 white, multiracial, other).  
29

30  
31 **Current PrEP use.** Participants were asked about their PrEP status and current users  
32 were identified based on their self-reported status (current use/not).  
33  
34

35  
36 **Clinical criteria guideline variables.** In both studies, participants were asked about post-  
37 exposure prophylaxis (PEP) use in the prior 12 months, drug use in the past three months (i.e.,  
38 cannabis, cocaine, stimulants, methamphetamine, inhalants, sedatives, GHB, MDMA,  
39 hallucinogen), and whether they received a sexually transmitted infection (STI) diagnosis (i.e.,  
40 syphilis, chlamydia or gonorrhea) in the past 12 months. Based on their answers, we developed  
41  
42  
43  
44  
45  
46  
47  
48  
49  
50  
51  
52  
53  
54  
55  
56  
57  
58  
59  
60

1  
2  
3 three dichotomous (yes/no) variables indicating their PEP, drug use, and STI experiences within  
4  
5 the timeframes noted.  
6

### 7 8 **State-level variables (level-2)**

9  
10 **Medicaid expansion status.** We created a three-level variable to indicate the state's  
11  
12 Medicaid expansion status as of 2020. We categorized as fully expanded, not expanded, or  
13  
14 conditionally expanded. Conditional expansion includes any alternative Medicaid expansion  
15  
16 model differing from the Affordable Care Act (ACA) format and one state that started expansion  
17  
18 in 2020 (i.e., Nebraska).<sup>28</sup>  
19  
20

### 21 **Patient and Public Involvement**

22  
23  
24 Patients were not involved in the development of this study  
25

### 26 **Ethics Approval Statement**

27  
28 Procedures for each of the cohort studies, as well as those to merge de-identified datasets  
29  
30 were reviewed and approved by the CUNY Internal Review Board (Protocol number: 2019-  
31  
32 0334).  
33  
34  
35  
36

### 37 **Analysis**

38  
39 Our analysis included a descriptive assessment of our sample's demographics and HIV-  
40  
41 clinical guideline-related variables, as well as a description of state-level variables. Next, we  
42  
43 built a multilevel logistic multivariable mixed-effects regression model predicting current PrEP  
44  
45 use (yes/no), using individual- (level-1) and state-level (level-2) predictors. We calculated the  
46  
47 fixed effects odds ratio and 95% confidence interval of our fixed-effect variables, as well as the  
48  
49 random effect intraclass correlation coefficients (ICC), the median odds ratios (MOR) of each of  
50  
51 our models, and the interval odds ratio (IOR-80) of our fixed-effect level-2 variables – random  
52  
53  
54  
55  
56  
57  
58  
59  
60

1  
2  
3 effect components were calculated via previously reported equations and methods.<sup>29, 30</sup> Our  
4  
5 model-building approach was the following, first, we constructed a null model (model 1) in order  
6  
7 to calculate the ICC and determine the variance in PrEP use accounted by an individual's state of  
8  
9 residency. After, we built a model with level-1 variables (model 2) to explore the fixed effects of  
10  
11 individual-level factors on current PrEP use. Finally, we built a full mixed effect multilevel  
12  
13 logistic model (model 3) with all variables in both levels. Our analysis was conducted using the  
14  
15 PROC GLIMMIX procedure with one random effect at the intercept, a binary distribution and a  
16  
17 logit link on SAS 9.4. We used Satterthwaite degrees of freedom. Random effects components  
18  
19 were calculated manually.<sup>29, 30</sup> Given our large sample size, we analyzed our intervals of  
20  
21 confidence and effect sizes when discussing statistical significance.  
22  
23  
24

## 25 26 **Results**

27  
28 Our US sample varied demographically with over a quarter being under 24 years old,  
29  
30 13% were over 50 years of age, about 1.7% were transgender people, and 40% were either  
31  
32 Black, Latinx or Multiracial. About 8% used PEP in the past 12 months, 60% used drugs in the  
33  
34 past 3 months, and 13% had a positive STI results in the past 12 months. In total, 15% of the  
35  
36 sample were current PrEP users, and the proportion of PrEP use was significantly greater in older  
37  
38 adults (68% v. 51%), white participants (59% v. 53%), people who recently used PEP (23% v  
39  
40 5%), who recently used drugs (74% v. 58%), and those who reported a recent STI diagnosis  
41  
42 (29% v. 10%). Table 1 provides further details about our sample individual-level (level-1)  
43  
44 variables. States-level characteristics (level-2) also varied greatly with about 54% having fully  
45  
46 expanded Medicaid, and 22% having conditionally expanded. We provided this list as an  
47  
48 appendix.  
49  
50  
51  
52  
53  
54  
55  
56  
57  
58  
59  
60

**Table 1. Demographics and Clinical Guideline-related Characteristics of Sample (level-1)**

| Variables                                                  | <i>n</i> | %     | <i>Not currently on PrEP</i> |      | <i>Current PrEP user</i> |      |       |         |
|------------------------------------------------------------|----------|-------|------------------------------|------|--------------------------|------|-------|---------|
|                                                            | 123905   |       | 104330                       | 84%  | 18126                    | 15%  |       |         |
| <b>Age group</b>                                           |          |       |                              |      |                          |      | 2711  | <0.0001 |
| 24 & under                                                 | 32852    | 26.5% | 30694                        | 29%  | 2158                     | 12%  |       |         |
| 25-29                                                      | 26347    | 21.3% | 22471                        | 22%  | 3876                     | 21%  |       |         |
| 30-49                                                      | 48904    | 39.5% | 39370                        | 38%  | 9534                     | 53%  |       |         |
| 50+                                                        | 15802    | 12.8% | 13042                        | 13%  | 2760                     | 15%  |       |         |
| <b>Gender identity (<i>n</i>=123453)</b>                   |          |       |                              |      |                          |      | 69.81 | <0.0001 |
| Male                                                       | 105514   | 85.2% | 102827                       | 99%  | 18034                    | 99%  |       |         |
| Female (Trans woman)                                       | 348      | 0.3%  | 367                          | 0.4% | 21                       | 0.1% |       |         |
| Transgender Person                                         | 1706     | 1.4%  | 1759                         | 2%   | 200                      | 1.1% |       |         |
| Something else                                             | 215      | 0.2%  | 225                          | 0.2% | 20                       | 0.1% |       |         |
| <b>Race</b>                                                |          |       |                              |      |                          |      | 280.9 | <0.0001 |
| Black                                                      | 14237    | 11.5% | 12524                        | 12%  | 1713                     | 9%   |       |         |
| Latinx                                                     | 23999    | 19.4% | 20894                        | 20%  | 3105                     | 17%  |       |         |
| White                                                      | 65941    | 53.2% | 55210                        | 53%  | 10731                    | 59%  |       |         |
| Multiracial                                                | 11845    | 9.6%  | 10240                        | 10%  | 1605                     | 9%   |       |         |
| Other                                                      | 7883     | 6.4%  | 6709                         | 6%   | 1174                     | 6%   |       |         |
| <b>PEP in past 12 months (<i>n</i>= 123552)</b>            |          |       |                              |      |                          |      | 6616  | <0.0001 |
| Yes                                                        | 9713     | 7.8%  | 5542                         | 5%   | 4171                     | 23%  |       |         |
| No                                                         | 113839   | 91.9% | 99717                        | 96%  | 14122                    | 78%  |       |         |
| <b>Drug use in past 3 months (<i>n</i>= 122456)</b>        |          |       |                              |      |                          |      | 1615  | <0.0001 |
| Yes                                                        | 73837    | 59.6% | 60464                        | 58%  | 13373                    | 74%  |       |         |
| No                                                         | 48619    | 39.2% | 43866                        | 42%  | 4753                     | 26%  |       |         |
| <b>STI diagnosis in past 12 months (<i>n</i> = 122734)</b> |          |       |                              |      |                          |      | 5296  | <0.0001 |
| Yes                                                        | 15605    | 12.6% | 10280                        | 10%  | 5325                     | 29%  |       |         |
| No                                                         | 107129   | 86.5% | 94292                        | 90%  | 12837                    | 71%  |       |         |

Our regression model results are presented on Table 2, we report here the findings of our model

3. The odds of current PrEP use for all age groups were significantly higher when compared to people 24 years old and younger, with individuals 25-29 having 2.2 greater odds (aOR = 2.21, 95% CI: 2.15 - 2.28), 30-39 having 3.2 greater odds (aOR = 3.20, 95% CI: 3.12 - 3.29) and those 50 years old and older having 2.9 greater odds (aOR = 2.91, 95% CI: 2.82 - 3.01) of current PrEP use. All races had significantly lower odds current PrEP use when compared to white participants, with Black participants having 27% lower odds (aOR = 0.73, 95% CI: 0.71 – 0.76), 26% lower for Latinx (aOR = 0.74, 95% CI: 0.73 – 0.76), and 21% lower for multiracial individuals (aOR = 0.79, 95% CI: 0.76 – 0.81). Those who identified as female (aOR = 0.44, 95% CI: 0.35 – 0.56) or as a transgender person (aOR = 0.71, 95% CI: 0.66 – 0.77) had 66% and 29% significantly lower odds of being current PrEP users than those identifying as male.

Individuals who reported PEP use in the past 12 months (aOR = 3.94, 95% CI: 3.85 – 4.04), drug use in the past 3 months (aOR = 1.73, 95% CI: 1.70 – 1.76) or were diagnosed with an STI in the previous 12 months (aOR = 3.34, 95% CI: 3.27 – 3.42) had significantly greater odds of being current PrEP users. On the state level, individuals living in states with no Medicaid expansion had 31% lower odds of being current PrEP users (aOR = 0.69, 95% CI: 0.54 – 0.88), and those living in conditional Medicaid expansion state had 27% lower odds of being current PrEP users than individuals living in states with full expansion (aOR = 0.73, 95% CI: 0.56 – 0.95). For the states with no expansion (aOR= 0.69) the IOR-80 was between 0.37 – 1.30, and for those conditional expansion (aOR=0.73) it was between 0.39 – 1.38. The median odds of PrEP use between individuals with identical individual characteristics but from different states were 1.40 for the ones living in the Medicaid expansion states, compared to those not living in Medicaid expansion states. Overall, the state of residency accounted for about 6% in the variance of PrEP

use overall, and after accounting for fixed-effects of individuals and Medicaid expansion, it accounts for only 4% of the remaining variance.

Table 2. Multilevel mixed-effects regression predicting current PrEP use

| Fixed-Effects Variables                   | Model 1<br>(Null) | Model 2 | 95% CI       | Model 3          | 95% CI       |
|-------------------------------------------|-------------------|---------|--------------|------------------|--------------|
| <b>Demographics</b>                       |                   |         |              |                  |              |
| Age group (24 & Under)                    |                   |         |              |                  |              |
| 25-29                                     |                   | 2.21    | (2.09, 2.35) | 2.21             | (2.15, 2.28) |
| 30-49                                     |                   | 3.20    | (3.04, 3.37) | 3.19             | (3.04, 3.37) |
| 50+                                       |                   | 2.91    | (2.73, 3.1)  | 2.9              | (2.82, 3.01) |
| Race/Ethnicity (White)                    |                   |         |              |                  |              |
| Black                                     |                   | 0.73    | (0.69, 0.78) | 0.73             | (0.71, 0.76) |
| Latinx                                    |                   | 0.75    | (0.71, 0.78) | 0.74             | (0.73, 0.76) |
| Multiracial                               |                   | 0.79    | (0.74, 0.84) | 0.79             | (0.76, 0.81) |
| Other                                     |                   | 0.82    | (0.76, 0.88) | 0.82             | (0.79, 0.85) |
| Gender Identity (Male)                    |                   |         |              |                  |              |
| Female (Trans woman)                      |                   | 0.44    | (0.28, 0.7)  | 0.44             | (0.35, 0.56) |
| Something else                            |                   | 0.44    | (0.26, 0.73) | 0.42             | (0.33, 0.56) |
| Transgender person                        |                   | 0.71    | (0.61, 0.84) | 0.71             | (0.66, 0.77) |
| <b>Risk Variables</b>                     |                   |         |              |                  |              |
| PEP use in past 12 months (ref: No)       |                   | 3.94    | (3.76, 4.14) | 3.94             | (3.85, 4.04) |
| STI diagnosis in past 12 months (ref: No) |                   | 3.34    | (3.21, 3.48) | 3.34             | (3.27, 3.42) |
| Drug use in past 3 months (ref: No)       |                   | 1.73    | (1.67, 1.8)  | 1.73             | (1.7, 1.76)  |
| <b>State-level Variable</b>               |                   |         |              |                  |              |
| Medicaid Expansion status                 |                   |         |              |                  |              |
| No Expansion                              |                   |         |              | 0.69             | (0.54, 0.88) |
| Conditional Expansion                     |                   |         |              | 0.73             | (0.56, 0.95) |
| <b>Random Effect Components</b>           |                   |         |              |                  |              |
| Interval Odds Ratio (IOR-80)              |                   |         |              |                  |              |
| Medicaid Expansion status                 |                   |         |              |                  |              |
| No Expansion                              |                   |         |              | (0.37 -<br>1.30) |              |
| Conditional Expansion                     |                   |         |              | (0.39 -<br>1.38) |              |
| Intercept Variance                        | 0.21              | 0.15    |              | 0.12             |              |
| Interclass Correlation Coefficient (ICC)  | 0.06              | 0.04    |              | 0.04             |              |
| Median Odds Ratio (MOR)                   | 1.54              | 1.45    |              | 1.40             |              |

## Discussion

In this US national survey with over 120,000 responses, we found that older age, white race, cisgender male identity, and meeting objective criteria per current guidelines were positive predictors of current PrEP use. Previous epidemiologic surveillance reports exploring PrEP uptake in the US using prescription drug data have found similar demographic outcomes.<sup>7</sup> Furthermore, though a state's Medicaid expansion status significantly predicted the likelihood an individual is currently taking PrEP, these effects were weak across states and did not explain variation in PrEP use in our analysis. Our study represents one of the largest U.S. national samples to explore multilevel predictors of current PrEP use, using individual and risk-related variables, and state-level variables.

Our findings affirmed the demographic disconnect between HIV and PrEP epidemiology in the US. While HIV incidence is disproportionately distributed in Black and Brown MSM and TGNB youth communities,<sup>15</sup> PrEP was most commonly used by older white cisgender men.<sup>7</sup> These effects persisted without change in effect size after controlling for Medicaid expansion. This contrast cannot be overlooked for the racial inequities in HIV outcomes in the US are historic and enduring. Aside from denying protection to communities who stand to benefit the most from PrEP, demographic inequities in access to HIV prevention interventions can significantly increase the magnitude of this racial inequity. Nevertheless, PrEP use was much more common among those who would have otherwise benefited from its protection most, such as those who had taken PEP, been recently treated for an STI, or reported drug use. This scenario presents a critical consideration to the successes, and possible limitations, of current PrEP guidelines in the US.<sup>31</sup> The guidelines, set forth by the CDC, have a strong focus on objective risk (i.e., recent bacterial STI, history of inconsistent or no condom use, sharing injection



1  
2  
3 equipment).<sup>32</sup> To that extent, our results demonstrated that guidelines can be successful in  
4 translating theory to practice: participants who reported any recent guideline criteria had as much  
5 as 3 times the odds of PrEP use than otherwise. However, the persistent demographic disconnect  
6 between *who gets HIV* and *who takes PrEP* requires discussing the limitations of recommending  
7 PrEP solely based on objective risk. Researchers in the US have previously speculated about the  
8 role an extension of guidelines would have in impacting PrEP uptake.<sup>33</sup> Using the premise of  
9 determining “good fit” of PrEP for a given patient’s goals, instead of “eligibility” for PrEP they  
10 suggest PrEP may be used to reduce HIV-related anxiety during sex and increase inter-partner  
11 intimacy.<sup>33</sup> The CDC and other agencies overseeing clinical guidelines should immediately  
12 consider heeding such advice. Australia, for example, is considered a model-jurisdiction for  
13 PrEP implementation, with several reports associating community PrEP uptake to substantial  
14 declines in HIV incidence.<sup>34, 35</sup> The guidelines for offering PrEP in Australia are much broader  
15 and comprehensive than those of the CDC, including reasons for offering PrEP such as “*when a*  
16 *person plans to travel during which time they anticipate that they will be having condomless sex*  
17 *with casual partners,*” and “*when a person reports being so anxious about HIV infection that it*  
18 *may prevent them from having regular HIV testing, or engaging in any form of anal sex.*”<sup>36</sup> A  
19 more inclusive set of clinical recommendations may have a much greater impact on PrEP uptake  
20 than traditional community outreach strategies; agencies and organizations with jurisdiction over  
21 these guidelines should consider doing so.

22  
23  
24  
25  
26  
27  
28  
29  
30  
31  
32  
33  
34  
35  
36  
37  
38  
39  
40  
41  
42  
43  
44  
45  
46  
47 In exploring the role of a state’s Medicaid expansion in predicting current PrEP use, we  
48 found mixed results. The median OR (MOR = 1.40) suggests that at least 50% of the odds of  
49 PrEP use between multiple pairs of identical individuals living in different states are 40% greater  
50 or higher, on average, for individuals living in states with Medicaid expansion. This finding is in  
51  
52  
53  
54  
55  
56  
57  
58  
59  
60

1  
2  
3 line with previously reported effect estimates of PrEP use in relation to Medicaid expansion.<sup>23-25</sup>  
4  
5 However, our final model ICC indicated that the state of residency of a given participant  
6  
7 accounted for only 4% of the variance of PrEP use in our analysis, and the IOR-80 for our  
8  
9 Medicaid expansion variables measure of association (i.e., odds ratio) included the null value - 1.  
10  
11 In MLA, the inclusion of the null value on the IOR-80 indicates that the variable was not  
12  
13 relevant to understanding the state-level variation in an individual predisposition to use PrEP.<sup>30</sup>  
14  
15 Furthermore, the positive MOR observed in our analysis must be understood in light of the small  
16  
17 ICC presented in our model, though there may have been strong differences between two  
18  
19 individuals from different states tendency to use PrEP, there was not enough variation between  
20  
21 states for Medicaid expansion to impact PrEP use. In MLA, the estimate of the ICC is highly  
22  
23 dependent on the area-level variable variance (e.g, state-level),<sup>29</sup> which suggests that perhaps a  
24  
25 smaller area-level analysis, like zip code or county-level, may be better suited to understand the  
26  
27 impact of Medicaid expansion on PrEP uptake. Previously reported regional disparities in PrEP  
28  
29 use seems to suggest this as well. For example, though Medicaid expansion has been associated  
30  
31 with increased PrEP use, a majority of states have been found to have less than one PrEP-  
32  
33 providing clinic per 100,000 people.<sup>37</sup> A narrower area of analysis, using MLA, may be  
34  
35 advisable to explore how much geographic region explains disparities in PrEP use, and to  
36  
37 explore the question about Medicaid expansion more effectively.

#### 44 **Limitations:**

45  
46 Our findings must be understood in light of several limitations. First, our data were  
47  
48 collected via self-report and may be subjected to social desirability bias. Several demographic  
49  
50 variables that could further influence PrEP use were not measured such as health insurance  
51  
52 status, income, and other social determinants of health. In our analysis we did not control from  
53  
54  
55  
56  
57  
58  
59  
60

1  
2  
3 insurance type, for example, rather we explored the population-level effect of living in a  
4  
5 Medicaid expansion state. It may be relevant to oversample patients receiving Medicaid and  
6  
7 control for insurance information in future analysis.  
8  
9

10 Lastly, the parent studies of our dataset recruited participants using similar strategies that  
11  
12 may have resulted in the same participants responding to both surveys. We note that we treated  
13  
14 each individual response as independent. Although we cannot ascertain precisely the amount of  
15  
16 overlap of participants across surveys, the studies' recruitment strategies utilized multiple  
17  
18 applications platforms, each of which has millions of daily users. Therefore, the relative pool of  
19  
20 available participants is several times the magnitude of those who actually took our surveys.  
21  
22

### 23 **Conclusion:**

24  
25  
26 Our analysis showed that PrEP use is less common in communities standing to benefit the  
27  
28 most from it – young MSM and TGNB of color. However, individuals meeting federal  
29  
30 guidelines for PrEP were significantly more likely to use PrEP. Updating guidelines may provide  
31  
32 a strong avenue to improve uptake and reduce racial disparities. Additionally, individuals living  
33  
34 in states where Medicaid was expanded were similarly more likely to use PrEP, however we did  
35  
36 not find that this variable was significant to explain state-level differences in PrEP use.  
37  
38  
39  
40  
41  
42  
43  
44  
45  
46  
47  
48  
49  
50  
51  
52  
53  
54  
55  
56  
57  
58  
59  
60

1  
2  
3 **Acknowledgements:** We are thankful to participants for their time as well as other members of  
4 the *Together 5000* study team.  
5  
6

7  
8 **Authorship contribution statement**  
9

10 PC, and CG conceptualized the paper, with PC performing the main analysis - both reviewed  
11 multiples drafts and contributed to each section of the paper. CM performed the initial bivariate  
12 analysis, extracted the data, and provided valuable data analysis and variable development  
13 feedback. SJ Developed the dataset, conceptualized the variables, and reviewed multiple drafts  
14 of the manuscript. JR provided key methodology feedback, and analytical guidance.  
15  
16

17  
18  
19 Additionally, JR helped with the interpretation of results.  
20  
21

22  
23  
24 **Data Sharing Statement**  
25

26 No additional data available  
27  
28

29 **Author(s') disclosure statement(s)**  
30

31 All authors report no conflict of interest.  
32

33  
34 **Funding statement**  
35

36 This work was supported by the National Institutes for Health grant number UH3 AI 133675  
37 (GroV).  
38  
39  
40  
41  
42  
43  
44  
45  
46  
47  
48  
49  
50  
51  
52  
53  
54  
55  
56  
57  
58  
59  
60

## References

1. Roehr B. FDA approves first drug to prevent HIV infection. *BMJ: British Medical Journal (Online)*. 2012;345
2. McCormack S, Dunn DT, Desai M, et al. Pre-exposure prophylaxis to prevent the acquisition of HIV-1 infection (PROUD): effectiveness results from the pilot phase of a pragmatic open-label randomised trial. *The Lancet*. 2016;387(10013):53-60.
3. Liu AY, Cohen SE, Vittinghoff E, et al. Preexposure prophylaxis for HIV infection integrated with municipal-and community-based sexual health services. *JAMA internal medicine*. 2016;176(1):75-84.
4. Volk JE, Marcus JL, Phengrasamy T, et al. No new HIV infections with increasing use of HIV preexposure prophylaxis in a clinical practice setting. *Clinical infectious diseases*. 2015;61(10):1601-1603.
5. Fauci AS. An HIV vaccine is essential for ending the HIV/AIDS pandemic. *Jama*. 2017;318(16):1535-1536.
6. Smith DK, Van Handel M, Wolitski RJ, et al. Vital signs: estimated percentages and numbers of adults with indications for preexposure prophylaxis to prevent HIV acquisition—United States, 2015. *Morbidity and Mortality Weekly Report*. 2015;64(46):1291-5.
7. Ya-lin AH, Zhu W, Smith DK, Harris N, Hoover KW. HIV Preexposure Prophylaxis, by Race and Ethnicity—United States, 2014–2016. *Morbidity and Mortality Weekly Report*. 2018;67(41):1147.
8. AVAC. PrEPWatch. 2020. <https://www.prepwatch.org/country/united-states/>
9. Marcus JL, Hurley LB, Hare CB, et al. Preexposure prophylaxis for HIV prevention in a large integrated health care system: adherence, renal safety, and discontinuation. *Journal of acquired immune deficiency syndromes (1999)*. 2016;73(5):540.
10. Morgan E, Ryan DT, Newcomb ME, Mustanski B. High rate of discontinuation may diminish PrEP coverage among young men who have sex with men. *AIDS and Behavior*. 2018;22(11):3645-3648.

- 1  
2  
3 11. Scott HM, Spinelli M, Vittinghoff E, et al. Racial/Ethnic and HIV risk category disparities in PrEP  
4 discontinuation among patients in publicly-funded primary care clinics. *AIDS*. 2019;  
5  
6  
7 12. Holloway I, Dougherty R, Gildner J, et al. PrEP uptake, adherence, and discontinuation among  
8 California YMSM using geosocial networking applications. *Journal of acquired immune deficiency*  
9  
10 *syndromes (1999)*. 2017;74(1):15.  
11  
12  
13 13. Huang Y-LA, Tao G, Smith DK, Hoover KW. Persistence with human immunodeficiency virus pre-  
14 exposure prophylaxis in the United States, 2012–2017. *Clinical Infectious Diseases*. 2021;72(3):379-385.  
15  
16  
17 14. Grey JA, Bernstein KT, Sullivan PS, et al. Estimating the population sizes of men who have sex  
18 with men in US states and counties using data from the American Community Survey. *JMIR public health*  
19 *and surveillance*. 2016;2(1):e14.  
20  
21  
22  
23 15. CDC. *HIV Surveillance Report, 2017*. Vol. 29. 2019. November 2018.  
24  
25  
26  
27 16. Hess KL, Hu X, Lansky A, Mermin J, Hall HI. Lifetime risk of a diagnosis of HIV infection in the  
28 United States. *Annals of epidemiology*. 2017;27(4):238-243.  
29  
30  
31  
32 17. Mayer KH, Agwu A, Malebranche D. Barriers to the Wider Use of Pre-exposure Prophylaxis in the  
33 United States: A Narrative Review. *Advances in Therapy*. 2020;37(5):1778-1811.  
34  
35  
36  
37 18. Golub SA, Gamarel KE, Rendina HJ, Surace A, Lelutiu-Weinberger CL. From efficacy to  
38 effectiveness: facilitators and barriers to PrEP acceptability and motivations for adherence among MSM  
39 and transgender women in New York City. *AIDS patient care and STDs*. 2013;27(4):248-254.  
40  
41  
42  
43 19. Shrestha R, Karki P, Altice FL, et al. Measuring Acceptability and Preferences for Implementation  
44 of Pre-Exposure Prophylaxis (PrEP) Using Conjoint Analysis: An Application to Primary HIV Prevention  
45 Among High Risk Drug Users. *AIDS and Behavior*. 2018-04-01 2018;22(4):1228-1238.  
46  
47  
48  
49 doi:10.1007/s10461-017-1851-1  
50  
51  
52 20. Patel R, Singh S, Farag C, al. e. Out-of-pocket costs impede PrEP use among young MSM in the  
53 private healthcare system. Presented at Conference on Retroviruses and Opportunistic Infections 2018.  
54  
55  
56  
57  
58  
59  
60

- 1  
2  
3 21. Kay ES, Pinto RM. Is insurance a barrier to HIV preexposure prophylaxis? Clarifying the issue.  
4  
5 *American Journal of Public Health*. 2020;110(1):61-64.  
6  
7 22. Garfield R, Damico A, Stephens J, Rouhani S. The coverage gap: uninsured poor adults in states  
8 that do not expand Medicaid—an update. *Menlo Park, CA: Kaiser Family Foundation*. 2016;  
9  
10 23. Karletsos D, Stoecker C. Impact of Medicaid Expansion on PrEP Utilization in the US: 2012–2018.  
11  
12 *AIDS and Behavior*. 2020:1-9.  
13  
14 24. Patel RR, Mena L, Nunn A, et al. Impact of insurance coverage on utilization of pre-exposure  
15 prophylaxis for HIV prevention. *PLoS One*. 2017;12(5):e0178737.  
16  
17 25. Baugher AR, Finlayson T, Lewis R, et al. Health Care Coverage and Preexposure Prophylaxis  
18 (PrEP) Use Among Men Who Have Sex With Men Living in 22 US Cities With Medicaid Expansion, 2017.  
19  
20 *American Journal of Public Health*. 2021;(0):e1-e9.  
21  
22 26. Grov C, Westmoreland DA, Carneiro PB, et al. Recruiting vulnerable populations to participate in  
23 HIV prevention research: findings from the Together 5000 cohort study. *Annals of Epidemiology*. May 16  
24 2019;doi:10.1016/j.annepidem.2019.05.003  
25  
26 27. Rendina HJ, Talan AJ, Tavella NF, et al. Leveraging Technology to Blend Large-Scale  
27 Epidemiologic Surveillance with Social and Behavioral Science Methods: Successes, Challenges, and  
28 Lessons Learned Implementing the UNITE Longitudinal Cohort Study of HIV risk factors among Sexual  
29 Minority Men in the US. *American Journal of Epidemiology*. 2020;  
30  
31 Foundation KF. Status of state action on the Medicaid expansion decision. *Kff.org*. 2016;  
32  
33 29. Austin PC, Merlo J. Intermediate and advanced topics in multilevel logistic regression analysis.  
34 *Statistics in medicine*. 2017;36(20):3257-3277.  
35  
36 30. Merlo J, Chaix B, Ohlsson H, et al. A brief conceptual tutorial of multilevel analysis in social  
37 epidemiology: using measures of clustering in multilevel logistic regression to investigate contextual  
38 phenomena. *Journal of Epidemiology & Community Health*. 2006;60(4):290-297.  
39  
40  
41  
42  
43  
44  
45  
46  
47  
48  
49  
50  
51  
52  
53  
54  
55  
56  
57  
58  
59  
60

- 1  
2  
3 31. CDC. *Preexposure prophylaxis for the prevention of HIV infection in the United States—2017*  
4  
5 *Update: a clinical practice guideline*. 2018.  
6  
7 32. CDC. Preexposure Prophylaxis for the Prevention of HIV Infection in the United States—2017  
8  
9 Update: A Clinical Practice Guideline. CDC website 2018.  
10  
11 33. Golub SA, Myers JE. Next-Wave HIV Pre-Exposure Prophylaxis Implementation for Gay and  
12  
13 Bisexual Men. *AIDS patient care and STDs*. 2019;  
14  
15 34. Grulich AE, Guy R, Amin J, et al. Population-level effectiveness of rapid, targeted, high-coverage  
16  
17 roll-out of HIV pre-exposure prophylaxis in men who have sex with men: the EPIC-NSW prospective  
18  
19 cohort study. *The lancet HIV*. 2018;5(11):e629-e637.  
20  
21 35. Medland NA, Grulich AE. HIV diagnoses in Australia fall as clinicians embrace pre-exposure  
22  
23 prophylaxis. *AN INDEPENDENT REVIEW*. 2020:182.  
24  
25 36. Australasian Society of HIV VH, Medicine SH. PrEP guidelines update: prevent HIV by prescribing  
26  
27 PrEP. ASHM Sydney; 2019.  
28  
29 37. Siegler AJ, Bratcher A, Weiss KM, et al. Location Location Location: An Exploration of Disparities  
30  
31 in Access to Publicly Listed PrEP Clinics in the United States. *Annals of Epidemiology*. 2018;  
32  
33 38. Ojikutu BO, Bogart LM, Mayer KH, Stopka TJ, Sullivan PS, Ransome Y. Spatial access and  
34  
35 willingness to use pre-exposure prophylaxis among Black/African American individuals in the United  
36  
37 States: cross-sectional survey. *JMIR public health and surveillance*. 2019;5(1):e12405.  
38  
39  
40  
41  
42  
43  
44  
45  
46  
47  
48  
49  
50  
51  
52  
53  
54  
55  
56  
57  
58  
59  
60



## **Appendix. State-level (level-2) Medicaid Expansion Status**

| <b>State</b>         | <b>Sample population</b> | <b>Medicaid Expansion Status 2020</b> |
|----------------------|--------------------------|---------------------------------------|
| Alabama              | 1,461                    | Not expanded                          |
| Alaska               | 204                      | Fully expanded                        |
| Arizona              | 2,791                    | Conditionally Expanded                |
| Arkansas             | 830                      | Conditionally Expanded                |
| California           | 16,723                   | Fully expanded                        |
| Colorado             | 2,413                    | Fully expanded                        |
| Connecticut          | 1,137                    | Fully expanded                        |
| Delaware             | 340                      | Fully expanded                        |
| District of Columbia | 1,072                    | Fully expanded                        |
| Florida              | 9,654                    | Not expanded                          |
| Georgia              | 4,311                    | Not expanded                          |
| Hawaii               | 511                      | Fully expanded                        |
| Idaho                | 497                      | Fully expanded                        |
| Illinois             | 5,079                    | Fully expanded                        |
| Indiana              | 2,098                    | Conditionally Expanded                |
| Iowa                 | 912                      | Conditionally Expanded                |
| Kansas               | 776                      | Not expanded                          |
| Kentucky             | 1,432                    | Conditionally Expanded                |
| Louisiana            | 1,600                    | Fully expanded                        |
| Maine                | 371                      | Fully expanded                        |
| Maryland             | 1,944                    | Fully expanded                        |
| Massachusetts        | 2,816                    | Fully expanded                        |
| Michigan             | 2,745                    | Conditionally Expanded                |
| Minnesota            | 1,739                    | Fully expanded                        |
| Mississippi          | 744                      | Not expanded                          |
| Missouri             | 1,807                    | Not expanded                          |
| Montana              | 308                      | Fully expanded                        |
| Nebraska             | 594                      | Conditionally Expanded                |
| Nevada               | 1,412                    | Fully expanded                        |
| New Hampshire        | 413                      | Conditionally Expanded                |
| New Jersey           | 2,741                    | Fully expanded                        |
| New Mexico           | 822                      | Conditionally Expanded                |
| New York             | 11,010                   | Fully expanded                        |
| North Carolina       | 3,367                    | Not expanded                          |
| North Dakota         | 199                      | Fully expanded                        |
| Ohio                 | 3,652                    | Conditionally Expanded                |
| Oklahoma             | 1,163                    | Not expanded                          |
| Oregon               | 1,659                    | Fully expanded                        |
| Pennsylvania         | 4,192                    | Fully expanded                        |
| Puerto Rico          | 1,119                    | Fully expanded                        |
| Rhode Island         | 432                      | Fully expanded                        |
| South Carolina       | 1,504                    | Not expanded                          |

|    |               |        |                        |
|----|---------------|--------|------------------------|
| 1  |               |        |                        |
| 2  | South Dakota  | 192    | Not expanded           |
| 3  | Tennessee     | 2,005  | Not expanded           |
| 4  | Texas         | 11,750 | Not expanded           |
| 5  | Utah          | 1,285  | Conditionally Expanded |
| 6  | Vermont       | 193    | Fully expanded         |
| 7  | Virginia      | 2,757  | Fully expanded         |
| 8  | Washington    | 2,812  | Fully expanded         |
| 9  | West Virginia | 511    | Fully expanded         |
| 10 | Wisconsin     | 1,641  | Not expanded           |
| 11 | Wyoming       | 165    | Not expanded           |
| 12 |               |        |                        |
| 13 |               |        |                        |
| 14 |               |        |                        |
| 15 |               |        |                        |
| 16 |               |        |                        |
| 17 |               |        |                        |
| 18 |               |        |                        |
| 19 |               |        |                        |
| 20 |               |        |                        |
| 21 |               |        |                        |
| 22 |               |        |                        |
| 23 |               |        |                        |
| 24 |               |        |                        |
| 25 |               |        |                        |
| 26 |               |        |                        |
| 27 |               |        |                        |
| 28 |               |        |                        |
| 29 |               |        |                        |
| 30 |               |        |                        |
| 31 |               |        |                        |
| 32 |               |        |                        |
| 33 |               |        |                        |
| 34 |               |        |                        |
| 35 |               |        |                        |
| 36 |               |        |                        |
| 37 |               |        |                        |
| 38 |               |        |                        |
| 39 |               |        |                        |
| 40 |               |        |                        |
| 41 |               |        |                        |
| 42 |               |        |                        |
| 43 |               |        |                        |
| 44 |               |        |                        |
| 45 |               |        |                        |
| 46 |               |        |                        |
| 47 |               |        |                        |
| 48 |               |        |                        |
| 49 |               |        |                        |
| 50 |               |        |                        |
| 51 |               |        |                        |
| 52 |               |        |                        |
| 53 |               |        |                        |
| 54 |               |        |                        |
| 55 |               |        |                        |
| 56 |               |        |                        |
| 57 |               |        |                        |
| 58 |               |        |                        |
| 59 |               |        |                        |
| 60 |               |        |                        |

# BMJ Open

## Demographic, Clinical Guideline Criteria, Medicaid Expansion and State of Residency: A Multilevel Analysis of PrEP use on a Large US Sample

|                                 |                                                                                                                                                                                                                                                                                                                                                                                           |
|---------------------------------|-------------------------------------------------------------------------------------------------------------------------------------------------------------------------------------------------------------------------------------------------------------------------------------------------------------------------------------------------------------------------------------------|
| Journal:                        | <i>BMJ Open</i>                                                                                                                                                                                                                                                                                                                                                                           |
| Manuscript ID                   | bmjopen-2021-055487.R1                                                                                                                                                                                                                                                                                                                                                                    |
| Article Type:                   | Original research                                                                                                                                                                                                                                                                                                                                                                         |
| Date Submitted by the Author:   | 03-Jan-2022                                                                                                                                                                                                                                                                                                                                                                               |
| Complete List of Authors:       | Carneiro, Pedro; CUNY School of Public Health, Community Health and Health Policy<br>Mirzayi, Chloe; City University of New York; City University of New York, Department of Epidemiology and Biostatistics<br>Jones, Scott; Hunter College, Pride Research Consortium<br>Rendina, Jonathon; Hunter College, Pride Research Consortium<br>Groves, Christian; CUNY School of Public Health |
| <b>Primary Subject Heading</b>: | Public health                                                                                                                                                                                                                                                                                                                                                                             |
| Secondary Subject Heading:      | Health policy, HIV/AIDS, Sexual health                                                                                                                                                                                                                                                                                                                                                    |
| Keywords:                       | PREVENTIVE MEDICINE, Public health < INFECTIOUS DISEASES, HIV & AIDS < INFECTIOUS DISEASES, Epidemiology < INFECTIOUS DISEASES                                                                                                                                                                                                                                                            |
|                                 |                                                                                                                                                                                                                                                                                                                                                                                           |

SCHOLARONE™  
Manuscripts



I, the Submitting Author has the right to grant and does grant on behalf of all authors of the Work (as defined in the below author licence), an exclusive licence and/or a non-exclusive licence for contributions from authors who are: i) UK Crown employees; ii) where BMJ has agreed a CC-BY licence shall apply, and/or iii) in accordance with the terms applicable for US Federal Government officers or employees acting as part of their official duties; on a worldwide, perpetual, irrevocable, royalty-free basis to BMJ Publishing Group Ltd ("BMJ") its licensees and where the relevant Journal is co-owned by BMJ to the co-owners of the Journal, to publish the Work in this journal and any other BMJ products and to exploit all rights, as set out in our [licence](#).

The Submitting Author accepts and understands that any supply made under these terms is made by BMJ to the Submitting Author unless you are acting as an employee on behalf of your employer or a postgraduate student of an affiliated institution which is paying any applicable article publishing charge ("APC") for Open Access articles. Where the Submitting Author wishes to make the Work available on an Open Access basis (and intends to pay the relevant APC), the terms of reuse of such Open Access shall be governed by a Creative Commons licence – details of these licences and which [Creative Commons](#) licence will apply to this Work are set out in our licence referred to above.

Other than as permitted in any relevant BMJ Author's Self Archiving Policies, I confirm this Work has not been accepted for publication elsewhere, is not being considered for publication elsewhere and does not duplicate material already published. I confirm all authors consent to publication of this Work and authorise the granting of this licence.

1  
2  
3 **Demographic, Clinical Guideline Criteria, Medicaid Expansion and State of Residency: A**  
4  
5 **Multilevel Analysis of PrEP use on a Large US Sample**  
6

7 Pedro B. Carneiro<sup>1</sup>, Chloe Mirzayi<sup>2</sup>, Scott Jones<sup>3</sup>, H. Jonathon Rendina<sup>3,4</sup>, Christian Grov<sup>1,2</sup>  
8  
9

10 1. Department of Community Health and Health Policy, CUNY Graduate School of Public Health  
11 and Health Policy, New York, NY  
12

13 2. CUNY Institute for Implementation Science in Population Health, New York, NY  
14

15 3. PRIDE Health Research Consortium, New York, NY  
16

17 4. Department of Psychology, Hunter College, CUNY, NY  
18  
19  
20  
21

22 **Corresponding author:** Pedro B Carneiro, MPH. Graduate Student. CUNY Graduate School of  
23 Public Health and Health Policy 55 W. 125th St., 7<sup>th</sup> Floor mailroom (c/o: Dr. C Grov). New  
24 York, NY 10027, USA. E-mail: [pedro.carneiro74@sphmail.cuny.edu](mailto:pedro.carneiro74@sphmail.cuny.edu)  
25  
26  
27  
28  
29  
30  
31

32 **Main manuscript word count:** 3202 words  
33  
34  
35  
36  
37

38 **Keywords:** PrEP uptake, biomedical prevention, multilevel analysis, health disparities, HIV  
39 prevention  
40  
41  
42  
43  
44  
45  
46  
47  
48  
49  
50  
51  
52  
53  
54  
55  
56  
57  
58  
59  
60

## Abstract

**Objective:** To explore the association of clinical guideline-related variables, demographics and Medicaid expansion on PrEP uptake in one of the largest US sample of MSM and TGNB people ever analyzed.

**Methods:** We analyzed predictors of current PrEP use using demographic and HIV risk-related variables (level-1), as well as state-level variables (level-2) (i.e, Medicaid Expansion status). We further explored the role state of residence plays in PrEP uptake disparities across the US.

**Results:** We found that the odds of PrEP use were significantly greater in older age, white, cisgender men. Moreover, individuals who reported recent PEP use, a recent sexually transmitted infection diagnosis and recent drug use were significantly more likely to report PrEP use. Lastly, we found **that** the median odds of PrEP use between similar individuals from different states were 1.40 for the ones living in the Medicaid expansion states, compared to those not living in Medicaid expansion states. State of residence did not play a significant role in explaining PrEP disparities overall.

**Conclusion:** Our analysis showed that PrEP use is less common in communities standing to benefit the most from it – young MSM and TGNB of color. However, individuals meeting federal guidelines for PrEP were significantly more likely to use PrEP. Though we found a positive association between living in Medicaid expansion states and PrEP use; that variable, as well as one's state of residency, were not suitable to explain variations in PrEP use in the US.

## Article summary

### Strengths and limitations of this study

1. This study reports on patient-level risk factors of PrEP use in a sample of over 6,000 cisgender men and transgender people who have sex with men across the United States, representing all states.
2. This study uses multi-level modelling analysis to understand the role of state-level predictors alongside individual-level predictors of PrEP use.
3. This study includes the magnitude of clinical guidelines criteria predictors of PrEP use in a US national sample, and the role of Medicaid Expansion on PrEP use.
4. This study was conducted in 2017 and 2018, and the implementation of PrEP across the United States is ever growing and changing.
5. The study uses self-reported cross-sectional data, and causal inference cannot be drawn from the analysis

## Introduction

In 2012, the US Food and Drug Administration (FDA) approved the first daily HIV preexposure prophylactic (PrEP) medication in the form of tenofovir disoproxil fumarate and emtricitabine (TDF/FTC).<sup>1</sup> Following its approval, the CDC estimated that as many as 1.2 million Americans would benefit from taking the regimen.<sup>2</sup> By 2017, only approximately 80,000 prescriptions were filled by unique HIV-negative users.<sup>3</sup>

Recent estimations of PrEP use in the general population suggest that as many as 200,000 individuals have initiated or persisted in PrEP year-over-year since the 2012 FDA approval through 2020,<sup>4</sup> a number still lower than expected.<sup>2</sup> Researchers in the US have reported PrEP discontinuation rates of up to 60% following six-months of initiation.<sup>5-8</sup> An analysis of persistence (i.e., continuous use) data using prescription drug records in the US from 2012-2017 found that PrEP persistence was only 14-months on average, and significantly differed by race, age group and insurance status.<sup>9</sup> Understanding this issue is critical for communities at-risk for HIV, especially Black and Latinx MSM communities.<sup>10</sup> A limitation of current PrEP use reports in the US is their reliance on pharmacy claims data,<sup>3</sup> or multiple different sources to obtain estimates,<sup>4</sup> limiting one's ability to account for confounding variables, like HIV-related risk factors. They also limit a deeper exploration of complex questions by limiting the study unit to a prescription claim, for example, rather than one individual. There is an immediate need to develop solutions to mitigate both issues - the overall uptake and persistence in PrEP, and the observed racial disparity in communities standing to benefit the most from it.

A prominent issue impacting PrEP uptake in the US is coverage, both financial coverage in the form of health insurance, and geographic coverage in the form of access to a provider who is competent and accepts your medical coverage. Issues related to having health insurance



1  
2  
3 coverage or being able to afford costs associated with medical care are widely reported  
4  
5 throughout the PrEP literature,<sup>11-14</sup> and they relate to an individual inability to pay for costs  
6  
7 associated with taking PrEP. However, financial coverage is also managed at the state-level,  
8  
9 through state-run Medicaid programs and drug assistance programs (DAP), which grant some  
10  
11 access and affordability to PrEP. Patients enrolled in Medicaid have mixed levels of PrEP access,  
12  
13 with enrollees with incomes under 150% of the federal poverty level (FPL) receiving PrEP for  
14  
15 nearly free due to federal laws limiting costs.<sup>15</sup> In 2010, the affordable care act (ACA) provided  
16  
17 states with the ability to expand Medicaid programs to adults aged 65 and younger with incomes  
18  
19 138% of the FPL (about \$17,000 a year) and below.<sup>15</sup> Several states have chosen to expand  
20  
21 Medicaid, and reports have linked increases in PrEP use to these expansions,<sup>16-18</sup> suggesting that  
22  
23 state variation in PrEP use may explain some of the disparities observed in the population at-  
24  
25 large. Thus far, the issue of Medicaid expansion has only been explored on the aggregate level,  
26  
27 limiting studies to measures of association which only informs on effect size but not on the  
28  
29 impact of the variable on the distribution of PrEP across communities. Understanding the impact  
30  
31 of Medicaid expansion on a population-level can support a better understanding of the  
32  
33 complexities in regional disparities in PrEP use, for example, by exploring the association of  
34  
35 Medicaid expansion and racial disparities in PrEP uptake. Furthermore, it seems imperative to  
36  
37 understand whether the state of residency of a particular individual is significant to explain PrEP  
38  
39 uptake.

40  
41  
42 Using the combined the screening/enrollment data from two similar-in-scope U.S.  
43  
44 national cohorts, we created one of the largest national samples of MSM and transgender and  
45  
46 gender non-binary (TGNB) individuals who have sex with men. Using a mixed-effect multilevel  
47  
48 logistic analysis (MLA) approach, we analyzed predictors of current PrEP use using  
49  
50  
51  
52  
53  
54  
55  
56  
57  
58  
59  
60

1  
2  
3 demographic and HIV risk-related variables (level-1), as well as state-level variables (level-2)  
4  
5 (i.e, Medicaid Expansion status).  
6

## 7 **Methods**

### 8 **About the studies**

9  
10  
11  
12 The *Together 5,000* and *UNITE* studies are both U.S. national cohorts longitudinally  
13  
14 following sexual and gender minorities at-risk for HIV. Both cohorts are similar in scope,  
15  
16 exploring sexual behavior and PrEP uptake. Details on both studies have been described  
17  
18 elsewhere.<sup>19,20</sup> Briefly, each used advertisements on geospatial sexual networking apps to recruit  
19  
20 MSM and TGNB people who have sex with men across the U.S. to enroll in longitudinal  
21  
22 assessments. During each study's enrollment phase, app-users were presented with an ad for the  
23  
24 study. Those interested were directed to a brief screening (i.e., eligibility) survey on their devices  
25  
26 browser. The present analysis utilizes the reconciled screening data from each study dataset (i.e.,  
27  
28 all variables that were identical across both screening surveys). Both studies enrolled samples in  
29  
30 2017 and 2018.  
31  
32  
33

34  
35 The sample's composition, which was not designed to be nationally representative, is  
36  
37 nonetheless one of the largest national surveys of sexual minorities, consisting of 157,035  
38  
39 responses, with 27% of the responses being from the *Together 5,000* study and the remainder  
40  
41 from *UNITE*. Our current analysis, exploring individual- and state-level predictors of current  
42  
43 PrEP use, was limited to individuals not living with HIV, and those residing in one of the 50  
44  
45 states, Washington, DC, or Puerto Rico – hereby referred to as “states.” Our decision to limit the  
46  
47 analytical sample to these states was based on state-level data availability. Our final sample was  
48  
49 inclusive of 123,905 (79%) cisgender men and TGNB people who have sex with men.  
50  
51  
52

### 53 **Individual-level variables (level-1)**

1  
2  
3 **Demographics.** Participants were grouped according to their age (under 24 years old, 25-  
4 29 years old, 30-49 years old, 50+ years old), gender identity (male, female (assigned male at  
5 birth), transgender person, something else), and race/ethnicity (Black, Latinx, white, multiracial,  
6 other).  
7  
8  
9  
10  
11

12 **Current PrEP use.** Participants were asked about their PrEP status and current users  
13 were identified based on their self-reported status (current use/not).  
14  
15

16 **Clinical criteria guideline variables.** In both studies, participants were asked about post-  
17 exposure prophylaxis (PEP) use in the prior 12 months, drug use in the past three months (i.e.,  
18 cannabis, cocaine, stimulants, methamphetamine, inhalants, sedatives, GHB, MDMA,  
19 hallucinogen), and whether they received a sexually transmitted infection (STI) diagnosis (i.e.,  
20 syphilis, chlamydia or gonorrhea) in the past 12 months. Based on their answers, we developed  
21 three dichotomous (yes/no) variables indicating their PEP, drug use, and STI experiences within  
22 the timeframes noted.  
23  
24  
25  
26  
27  
28  
29  
30  
31  
32

### 33 **State-level variables (level-2)**

34 **Medicaid expansion status.** We created a three-level variable to indicate the state's  
35 Medicaid expansion status as of 2020. We categorized as fully expanded, not expanded, or  
36 conditionally expanded. Conditional expansion includes any alternative Medicaid expansion  
37 model differing from the Affordable Care Act (ACA) format and one state that started expansion  
38 in 2020 (i.e., Nebraska).<sup>21</sup>  
39  
40  
41  
42  
43  
44  
45

### 46 **Patient and Public Involvement**

47 Patients were not involved in the development of this study  
48  
49  
50

### 51 **Ethics Approval Statement**

1  
2  
3 Procedures for each of the cohort studies, as well as those to merge de-identified datasets  
4  
5 were reviewed and approved by the CUNY Internal Review Board (Protocol number: 2019-  
6  
7 0334).  
8  
9

## 10 11 12 **Analysis** 13

14 Our analysis included a descriptive assessment of our sample's demographics and HIV-  
15 clinical guideline-related variables, as well as a description of state-level variables. Next, we  
16 built a multilevel logistic multivariable mixed-effects regression model predicting current PrEP  
17 use (yes/no), using individual- (level-1) and state-level (level-2) predictors. We calculated the  
18 fixed effects odds ratio and 95% confidence interval of our fixed-effect variables, as well as the  
19 random effect intraclass correlation coefficients (ICC), the median odds ratios (MOR) of each of  
20 our models, and the interval odds ratio (IOR-80) of our fixed-effect level-2 variables – random  
21 effect components were calculated via previously reported equations and methods.<sup>22,23</sup> Our  
22 model-building approach was the following, first, we constructed a null model (model 1) in order  
23 to calculate the ICC and determine the variance in PrEP use accounted by an individual's state of  
24 residency. After, we built a model with level-1 variables (model 2) to explore the fixed effects of  
25 individual-level factors on current PrEP use. Finally, we built a full mixed effect multilevel  
26 logistic model (model 3) with all variables in both levels. Our analysis was conducted using the  
27 PROC GLIMMIX procedure with one random effect at the intercept, a binary distribution and a  
28 logit link on SAS 9.4. We used Satterthwaite degrees of freedom. Random effects components  
29 were calculated manually.<sup>22,23</sup> Given our large sample size, we analyzed our intervals of  
30 confidence and effect sizes when discussing statistical significance.  
31  
32  
33  
34  
35  
36  
37  
38  
39  
40  
41  
42  
43  
44  
45  
46  
47  
48  
49  
50  
51  
52

## 53 54 **Results** 55 56 57 58 59 60

Our US sample varied demographically with over a quarter being under 24 years old, 13% were over 50 years of age, about 1.7% were transgender people, and 40% were either Black, Latinx or Multiracial. About 8% used PEP in the past 12 months, 60% used drugs in the past 3 months, and 13% had a positive STI results in the past 12 months. In total, 15% of the sample were current PrEP users, and the proportion of PrEP use was significantly greater in adults older than 29 y.o. (68% v. 51%), white participants (59% v. 53%), people who recently used PEP (23% v 5%), who recently used drugs (74% v. 58%), and those who reported a recent STI diagnosis (29% v. 10%). Table 1 provides further details about our sample individual-level (level-1) variables. States-level characteristics (level-2) also varied greatly with about 54% having fully expanded Medicaid, and 22% having conditionally expanded. We provided this list as an appendix.

**Table 1. Demographics and Clinical Guideline-related Characteristics of National Sample of Cisgender Men and Transgender People who have Sex with Men (level-1)**

| Variables                                | <i>n</i> | %     | <i>Not currently on PrEP</i> |      | <i>Current PrEP user</i> |      |       |         |
|------------------------------------------|----------|-------|------------------------------|------|--------------------------|------|-------|---------|
|                                          | 123905   |       | 104330                       | 84%  | 18126                    | 15%  |       |         |
| <b>Age group</b>                         |          |       |                              |      |                          |      | 2711  | <0.0001 |
| 24 & under                               | 32852    | 26.5% | 30694                        | 29%  | 2158                     | 12%  |       |         |
| 25-29                                    | 26347    | 21.3% | 22471                        | 22%  | 3876                     | 21%  |       |         |
| 30-49                                    | 48904    | 39.5% | 39370                        | 38%  | 9534                     | 53%  |       |         |
| 50+                                      | 15802    | 12.8% | 13042                        | 13%  | 2760                     | 15%  |       |         |
| <b>Gender identity (<i>n</i>=123453)</b> |          |       |                              |      |                          |      | 69.81 | <0.0001 |
| Male                                     | 120861   | 97.9% | 102827                       | 99%  | 18034                    | 99%  |       |         |
| Female (Trans woman)                     | 388      | 0.3%  | 367                          | 0.4% | 21                       | 0.1% |       |         |
| Transgender Person                       | 1959     | 1.6%  | 1759                         | 2%   | 200                      | 1.1% |       |         |
| Something else                           | 245      | 0.2%  | 225                          | 0.2% | 20                       | 0.1% |       |         |
| <b>Race</b>                              |          |       |                              |      |                          |      | 280.9 | <0.0001 |
| Black                                    | 14237    | 11.5% | 12524                        | 12%  | 1713                     | 9%   |       |         |

|                                                         |        |       |       |     |       |     |              |
|---------------------------------------------------------|--------|-------|-------|-----|-------|-----|--------------|
| Latinx                                                  | 23999  | 19.4% | 20894 | 20% | 3105  | 17% |              |
| White                                                   | 65941  | 53.2% | 55210 | 53% | 10731 | 59% |              |
| Multiracial                                             | 11845  | 9.6%  | 10240 | 10% | 1605  | 9%  |              |
| Other                                                   | 7883   | 6.4%  | 6709  | 6%  | 1174  | 6%  |              |
| <b>PEP in past 12 months<br/>(n= 123552)</b>            |        |       |       |     |       |     | 6616 <0.0001 |
| Yes                                                     | 9713   | 7.8%  | 5542  | 5%  | 4171  | 23% |              |
| No                                                      | 113839 | 91.9% | 99717 | 96% | 14122 | 78% |              |
| <b>Drug use in past 3<br/>months (n= 122456)</b>        |        |       |       |     |       |     | 1615 <0.0001 |
| Yes                                                     | 73837  | 59.6% | 60464 | 58% | 13373 | 74% |              |
| No                                                      | 48619  | 39.2% | 43866 | 42% | 4753  | 26% |              |
| <b>STI diagnosis in past<br/>12 months (n = 122734)</b> |        |       |       |     |       |     | 5296 <0.0001 |
| Yes                                                     | 15605  | 12.6% | 10280 | 10% | 5325  | 29% |              |
| No                                                      | 107129 | 86.5% | 94292 | 90% | 12837 | 71% |              |

Our regression model results are presented on Table 2, we report here the findings of our model

3. The odds of current PrEP use for all age groups were significantly higher when compared to people 24 years old and younger, with individuals 25-29 having 2.2 greater odds (aOR = 2.21, 95% CI: 2.15 - 2.28), 30-39 having 3.2 greater odds (aOR = 3.20, 95% CI: 3.12 - 3.29) and those 50 years old and older having 2.9 greater odds (aOR = 2.91, 95% CI: 2.82 - 3.01) of current PrEP use. All races had significantly lower odds current PrEP use when compared to white participants, with Black participants having 27% lower odds (aOR = 0.73, 95% CI: 0.71 – 0.76), 26% lower for Latinx (aOR = 0.74, 95% CI: 0.73 – 0.76), and 21% lower for multiracial individuals (aOR = 0.79, 95% CI: 0.76 – 0.81). Those who identified as female (aOR = 0.44, 95% CI: 0.35 – 0.56) or as a transgender person (aOR = 0.71, 95% CI: 0.66 – 0.77) had 66% and 29% significantly lower odds of being current PrEP users than those identifying as male.

Individuals who reported PEP use in the past 12 months (aOR = 3.94, 95% CI: 3.85 – 4.04), drug use in the past 3 months (aOR = 1.73, 95% CI: 1.70 – 1.76) or were diagnosed with an STI in the previous 12 months (aOR = 3.34, 95% CI: 3.27 – 3.42) had significantly greater odds of being current PrEP users. On the state level, individuals living in states with no Medicaid expansion had 31% lower odds of being current PrEP users (aOR = 0.69, 95% CI: 0.54 – 0.88), and those living in conditional Medicaid expansion state had 27% lower odds of being current PrEP users than individuals living in states with full expansion (aOR = 0.73, 95% CI: 0.56 – 0.95). For the states with no expansion (aOR= 0.69) the IOR-80 was between 0.37 – 1.30, and for those conditional expansion (aOR=0.73) it was between 0.39 – 1.38. The median odds of PrEP use between individuals with identical individual characteristics but from different states were 1.40 for the ones living in the Medicaid expansion states, compared to those not living in Medicaid expansion states. Overall, the state of residency accounted for about 6% in the variance of PrEP

use overall, and after accounting for fixed-effects of individuals and Medicaid expansion, it accounts for only 4% of the remaining variance.

**Table 2. Multilevel Mixed-Effects Regression Models Predicting Current PrEP Use**

| Fixed-Effects Variables                   | Model 1<br>(Null) | Model 2 | 95% CI       | Model 3          | 95% CI       |
|-------------------------------------------|-------------------|---------|--------------|------------------|--------------|
| <b>Demographics</b>                       |                   |         |              |                  |              |
| Age group (24 & Under)                    |                   |         |              |                  |              |
| 25-29                                     |                   | 2.21    | (2.09, 2.35) | 2.21             | (2.15, 2.28) |
| 30-49                                     |                   | 3.20    | (3.04, 3.37) | 3.19             | (3.04, 3.37) |
| 50+                                       |                   | 2.91    | (2.73, 3.1)  | 2.9              | (2.82, 3.01) |
| Race/Ethnicity (White)                    |                   |         |              |                  |              |
| Black                                     |                   | 0.73    | (0.69, 0.78) | 0.73             | (0.71, 0.76) |
| Latinx                                    |                   | 0.75    | (0.71, 0.78) | 0.74             | (0.73, 0.76) |
| Multiracial                               |                   | 0.79    | (0.74, 0.84) | 0.79             | (0.76, 0.81) |
| Other                                     |                   | 0.82    | (0.76, 0.88) | 0.82             | (0.79, 0.85) |
| Gender Identity (Male)                    |                   |         |              |                  |              |
| Female (Trans woman)                      |                   | 0.44    | (0.28, 0.7)  | 0.44             | (0.35, 0.56) |
| Something else                            |                   | 0.44    | (0.26, 0.73) | 0.42             | (0.33, 0.56) |
| Transgender person                        |                   | 0.71    | (0.61, 0.84) | 0.71             | (0.66, 0.77) |
| <b>Risk Variables</b>                     |                   |         |              |                  |              |
| PEP use in past 12 months (ref: No)       |                   | 3.94    | (3.76, 4.14) | 3.94             | (3.85, 4.04) |
| STI diagnosis in past 12 months (ref: No) |                   | 3.34    | (3.21, 3.48) | 3.34             | (3.27, 3.42) |
| Drug use in past 3 months (ref: No)       |                   | 1.73    | (1.67, 1.8)  | 1.73             | (1.7, 1.76)  |
| <b>State-level Variable</b>               |                   |         |              |                  |              |
| Medicaid Expansion status                 |                   |         |              |                  |              |
| No Expansion                              |                   |         |              | 0.69             | (0.54, 0.88) |
| Conditional Expansion                     |                   |         |              | 0.73             | (0.56, 0.95) |
| <b>Random Effect Components</b>           |                   |         |              |                  |              |
| Interval Odds Ratio (IOR-80)              |                   |         |              |                  |              |
| Medicaid Expansion status                 |                   |         |              |                  |              |
| No Expansion                              |                   |         |              | (0.37 -<br>1.30) |              |
| Conditional Expansion                     |                   |         |              | (0.39 -<br>1.38) |              |
| Intercept Variance                        | 0.21              | 0.15    |              | 0.12             |              |
| Interclass Correlation Coefficient (ICC)  | 0.06              | 0.04    |              | 0.04             |              |
| Median Odds Ratio (MOR)                   | 1.54              | 1.45    |              | 1.40             |              |



## Discussion

In this US national survey with over 120,000 responses, we found that older age, white race, cisgender male identity, and meeting objective criteria per current guidelines were positive predictors of current PrEP use. Previous epidemiologic surveillance reports exploring PrEP uptake in the US using prescription drug data have found similar demographic outcomes.<sup>3</sup> Furthermore, though a state's Medicaid expansion status significantly predicted the likelihood an individual is currently taking PrEP, these effects were weak across states and did not explain variation in PrEP use in our analysis. Our study represents one of the largest U.S. national samples to explore multilevel predictors of current PrEP use, using individual and risk-related variables, and state-level variables.

Our findings affirmed the demographic disconnect between HIV and PrEP epidemiology in the US. While HIV incidence is disproportionately distributed in Black and Brown MSM and TGNB youth communities,<sup>24</sup> PrEP was most commonly used by older white cisgender men.<sup>3</sup> These effects persisted without change in effect size after controlling for Medicaid expansion. This contrast cannot be overlooked for the racial inequities in HIV outcomes in the US are historic and enduring. Aside from denying protection to communities who stand to benefit the most from PrEP, demographic inequities in access to HIV prevention interventions can significantly increase the magnitude of this racial inequity. Nevertheless, PrEP use was much more common among those who would have otherwise benefited from its protection most, such as those who had taken PEP, been recently treated for an STI, or reported drug use. This scenario presents a critical consideration to the successes, and possible limitations, of current PrEP guidelines in the US.<sup>25</sup> The guidelines, set forth by the CDC, have a strong focus on objective risk (i.e., recent bacterial STI, history of inconsistent or no condom use, sharing injection

1  
2  
3 equipment).<sup>26</sup> To that extent, our results demonstrated that guidelines can be successful in  
4  
5 translating theory to practice: participants who reported any recent guideline criteria had as much  
6  
7 as 3 times the odds of PrEP use than otherwise. However, the persistent demographic disconnect  
8  
9 between *who gets HIV* and *who takes PrEP* requires discussing the limitations of recommending  
10  
11 PrEP solely based on objective risk. Researchers in the US have previously speculated about the  
12  
13 role an extension of guidelines would have in impacting PrEP uptake.<sup>27</sup> Using the premise of  
14  
15 determining “good fit” of PrEP for a given patient’s goals, instead of “eligibility” for PrEP they  
16  
17 suggest PrEP may be used to reduce HIV-related anxiety during sex and increase inter-partner  
18  
19 intimacy.<sup>27</sup> The CDC and other agencies overseeing clinical guidelines should immediately  
20  
21 consider heeding such advice. Australia, for example, is considered a model-jurisdiction for  
22  
23 PrEP implementation, with several reports associating community PrEP uptake to substantial  
24  
25 declines in HIV incidence.<sup>28,29</sup> The guidelines for offering PrEP in Australia are much broader  
26  
27 and comprehensive than those of the CDC, including reasons for offering PrEP such as “*when a*  
28  
29 *person plans to travel during which time they anticipate that they will be having condomless sex*  
30  
31 *with casual partners,”* and “*when a person reports being so anxious about HIV infection that it*  
32  
33 *may prevent them from having regular HIV testing, or engaging in any form of anal sex.*”<sup>30</sup> A  
34  
35 more inclusive set of clinical recommendations may have a much greater impact on PrEP uptake  
36  
37 than traditional community outreach strategies; agencies and organizations with jurisdiction over  
38  
39 these guidelines should consider doing so.

40  
41  
42 In exploring the role of a state’s Medicaid expansion in predicting current PrEP use, we  
43  
44 found mixed results. The median OR (MOR = 1.40) suggests that at least 50% of the odds of  
45  
46 PrEP use between multiple pairs of identical individuals living in different states are 40% greater  
47  
48 or higher, on average, for individuals living in states with Medicaid expansion. This finding is in  
49  
50  
51  
52  
53  
54  
55  
56  
57  
58  
59  
60

1  
2  
3 line with previously reported effect estimates of PrEP use in relation to Medicaid expansion.<sup>16-18</sup>  
4  
5 However, our final model ICC indicated that the state of residency of a given participant  
6  
7 accounted for only 4% of the variance of PrEP use in our analysis, and the IOR-80 for our  
8  
9 Medicaid expansion variables measure of association (i.e., odds ratio) included the null value - 1.  
10  
11 In MLA, the inclusion of the null value on the IOR-80 indicates that the variable was not  
12  
13 relevant to understanding the state-level variation in an individual predisposition to use PrEP.<sup>23</sup>  
14  
15 Furthermore, the positive MOR observed in our analysis must be understood in light of the small  
16  
17 ICC presented in our model, though there may have been strong differences between two  
18  
19 individuals from different states tendency to use PrEP, there was not enough variation between  
20  
21 states for Medicaid expansion to impact PrEP use. In MLA, the estimate of the ICC is highly  
22  
23 dependent on the area-level variable variance (e.g, state-level),<sup>22</sup> which suggests that perhaps a  
24  
25 smaller area-level analysis, like zip code or county-level, may be better suited to understand the  
26  
27 impact of Medicaid expansion on PrEP uptake. Previously reported regional disparities in PrEP  
28  
29 use seems to suggest this as well. For example, though Medicaid expansion has been associated  
30  
31 with increased PrEP use, a majority of states have been found to have less than one PrEP-  
32  
33 providing clinic per 100,000 people.<sup>31</sup> A narrower area of analysis, using MLA, may be  
34  
35 advisable to explore how much geographic region explains disparities in PrEP use, and to  
36  
37 explore the question about Medicaid expansion more effectively.  
38  
39  
40  
41  
42  
43

#### 44 **Limitations:**

45  
46 Our findings must be understood in light of several limitations. First, our data were  
47  
48 collected via self-report and may be subjected to social desirability bias. Several demographic  
49  
50 variables that could further influence PrEP use were not measured such as health insurance  
51  
52 status, income, and other social determinants of health. Further, our outcome variable (current  
53  
54  
55  
56  
57  
58  
59  
60

1  
2  
3 PrEP use) In our analysis we did not control from insurance type, for example, rather we  
4 explored the population-level effect of living in a Medicaid expansion state. It may be relevant to  
5  
6 oversample patients receiving Medicaid and control for insurance information in future analysis.  
7  
8  
9

10 The time our data was collected (2017-2018) is an additional limitation, and the relevance  
11 of the findings to the field of PrEP uptake might seem none. We call the reader's attention to the  
12 wholesome numbers of PrEP users reported in the United States – approximately 200,000 – a  
13 stagnant number since then until now.<sup>8</sup> We believe our findings provide some value to the  
14 question as to whether Medicaid expansion, as a variable, has an impact on an individual  
15 decision to start PrEP.  
16  
17  
18  
19  
20  
21  
22  
23

24 Lastly, the parent studies of our dataset recruited participants using similar strategies that  
25 may have resulted in the same participants responding to both surveys. We note that we treated  
26 each individual response as independent. Although we cannot ascertain precisely the amount of  
27 overlap of participants across surveys, the studies' recruitment strategies utilized multiple  
28 applications platforms, each of which has millions of daily users. Therefore, the relative pool of  
29 available participants is several times the magnitude of those who actually took our surveys.  
30  
31  
32  
33  
34  
35  
36  
37

### 38 **Conclusion:**

39  
40 Our analysis showed that PrEP use is less common in communities standing to benefit the  
41 most from it – young MSM and TGNB of color. However, individuals meeting federal  
42 guidelines for PrEP were significantly more likely to use PrEP. Updating guidelines may provide  
43 a strong avenue to improve uptake and reduce racial disparities. Additionally, individuals living  
44 in states where Medicaid was expanded were similarly more likely to use PrEP, however we did  
45 not find that this variable was significant to explain state-level differences in PrEP use.  
46  
47  
48  
49  
50  
51  
52  
53  
54  
55  
56  
57  
58  
59  
60

1  
2  
3  
4  
5  
6  
7  
8  
9  
10  
11  
12  
13  
14  
15  
16  
17  
18  
19  
20  
21  
22  
23  
24  
25  
26  
27  
28  
29  
30  
31  
32  
33  
34  
35  
36  
37  
38  
39  
40  
41  
42  
43  
44  
45  
46  
47  
48  
49  
50  
51  
52  
53  
54  
55  
56  
57  
58  
59  
60

For peer review only

1  
2  
3 **Acknowledgements:** We are thankful to participants for their time as well as other members of  
4 the *Together 5000* study team.  
5  
6

7  
8 **Authorship contribution statement**  
9

10 PC, and CG conceptualized the paper, with PC performing the main analysis - both reviewed  
11 multiples drafts and contributed to each section of the paper. CM performed the initial bivariate  
12 analysis, extracted the data, and provided valuable data analysis and variable development  
13 feedback. SJ Developed the dataset, conceptualized the variables, and reviewed multiple drafts  
14 of the manuscript. JR provided key methodology feedback, and analytical guidance.  
15  
16

17  
18  
19 Additionally, JR helped with the interpretation of results.  
20  
21

22  
23  
24 **Data Sharing Statement**  
25

26 No additional data available  
27  
28

29 **Author(s') disclosure statement(s)**  
30

31 All authors report no conflict of interest.  
32  
33

34 **Funding statement**  
35

36 This work was supported by the National Institutes for Health grant number UH3 AI 133675  
37 (GroV).  
38  
39  
40  
41  
42  
43  
44  
45  
46  
47  
48  
49  
50  
51  
52  
53  
54  
55  
56  
57  
58  
59  
60

## References

1. Roehr B. FDA approves first drug to prevent HIV infection. *BMJ: British Medical Journal (Online)*. 2012;345
2. Smith DK, Van Handel M, Wolitski RJ, et al. Vital signs: estimated percentages and numbers of adults with indications for preexposure prophylaxis to prevent HIV acquisition—United States, 2015. *Morbidity and Mortality Weekly Report*. 2015;64(46):1291-5.
3. Ya-lin AH, Zhu W, Smith DK, Harris N, Hoover KW. HIV Preexposure Prophylaxis, by Race and Ethnicity—United States, 2014–2016. *Morbidity and Mortality Weekly Report*. 2018;67(41):1147.
4. AVAC. PrEPWatch. 2020. <https://www.prepwatch.org/country/united-states/>
5. Marcus JL, Hurley LB, Hare CB, et al. Preexposure prophylaxis for HIV prevention in a large integrated health care system: adherence, renal safety, and discontinuation. *Journal of acquired immune deficiency syndromes (1999)*. 2016;73(5):540.
6. Morgan E, Ryan DT, Newcomb ME, Mustanski B. High rate of discontinuation may diminish PrEP coverage among young men who have sex with men. *AIDS and Behavior*. 2018;22(11):3645-3648.
7. Scott HM, Spinelli M, Vittinghoff E, et al. Racial/Ethnic and HIV risk category disparities in PrEP discontinuation among patients in publicly-funded primary care clinics. *AIDS*. 2019;
8. Holloway I, Dougherty R, Gildner J, et al. PrEP uptake, adherence, and discontinuation among California YMSM using geosocial networking applications. *Journal of acquired immune deficiency syndromes (1999)*. 2017;74(1):15.
9. Huang Y-LA, Tao G, Smith DK, Hoover KW. Persistence with human immunodeficiency virus pre-exposure prophylaxis in the United States, 2012–2017. *Clinical Infectious Diseases*. 2021;72(3):379-385.
10. Hess KL, Hu X, Lansky A, Mermin J, Hall HI. Lifetime risk of a diagnosis of HIV infection in the United States. *Annals of epidemiology*. 2017;27(4):238-243.
11. Mayer KH, Agwu A, Malebranche D. Barriers to the Wider Use of Pre-exposure Prophylaxis in the United States: A Narrative Review. *Advances in Therapy*. 2020;37(5):1778-1811.
12. Golub SA, Gamarel KE, Rendina HJ, Surace A, Lelutiu-Weinberger CL. From efficacy to effectiveness: facilitators and barriers to PrEP acceptability and motivations for adherence among MSM and transgender women in New York City. *AIDS patient care and STDs*. 2013;27(4):248-254.
13. Shrestha R, Karki P, Altice FL, et al. Measuring Acceptability and Preferences for Implementation of Pre-Exposure Prophylaxis (PrEP) Using Conjoint Analysis: An Application to Primary HIV Prevention Among High Risk Drug Users. *AIDS and Behavior*. 2018-04-01 2018;22(4):1228-1238. doi:10.1007/s10461-017-1851-1
14. Patel R, Singh S, Farag C, al. e. Out-of-pocket costs impede PrEP use among young MSM in the private healthcare system. Presented at Conference on Retroviruses and Opportunistic Infections 2018.
15. Kay ES, Pinto RM. Is insurance a barrier to HIV preexposure prophylaxis? Clarifying the issue. *American Journal of Public Health*. 2020;110(1):61-64.
16. Karletsos D, Stoecker C. Impact of Medicaid Expansion on PrEP Utilization in the US: 2012–2018. *AIDS and Behavior*. 2020:1-9.
17. Patel RR, Mena L, Nunn A, et al. Impact of insurance coverage on utilization of pre-exposure prophylaxis for HIV prevention. *PLoS One*. 2017;12(5):e0178737.
18. Baugher AR, Finlayson T, Lewis R, et al. Health Care Coverage and Preexposure Prophylaxis (PrEP) Use Among Men Who Have Sex With Men Living in 22 US Cities With Medicaid Expansion, 2017. *American Journal of Public Health*. 2021;(0):e1-e9.
19. Grov C, Westmoreland DA, Carneiro PB, et al. Recruiting vulnerable populations to participate in HIV prevention research: findings from the Together 5000 cohort study. *Annals of Epidemiology*. May 16 2019;doi:10.1016/j.annepidem.2019.05.003

- 1
  - 2
  - 3
  - 4
  - 5
  - 6
  - 7
  - 8
  - 9
  - 10
  - 11
  - 12
  - 13
  - 14
  - 15
  - 16
  - 17
  - 18
  - 19
  - 20
  - 21
  - 22
  - 23
  - 24
  - 25
  - 26
  - 27
  - 28
  - 29
  - 30
  - 31
  - 32
  - 33
  - 34
  - 35
  - 36
  - 37
  - 38
  - 39
  - 40
  - 41
  - 42
  - 43
  - 44
  - 45
  - 46
  - 47
  - 48
  - 49
  - 50
  - 51
  - 52
  - 53
  - 54
  - 55
  - 56
  - 57
  - 58
  - 59
  - 60
20. Rendina HJ, Talan AJ, Tavella NF, et al. Leveraging Technology to Blend Large-Scale Epidemiologic Surveillance with Social and Behavioral Science Methods: Successes, Challenges, and Lessons Learned Implementing the UNITE Longitudinal Cohort Study of HIV risk factors among Sexual Minority Men in the US. *American Journal of Epidemiology*. 2020;
21. Foundation KF. Status of state action on the Medicaid expansion decision. *Kff.org*. 2016;
22. Austin PC, Merlo J. Intermediate and advanced topics in multilevel logistic regression analysis. *Statistics in medicine*. 2017;36(20):3257-3277.
23. Merlo J, Chaix B, Ohlsson H, et al. A brief conceptual tutorial of multilevel analysis in social epidemiology: using measures of clustering in multilevel logistic regression to investigate contextual phenomena. *Journal of Epidemiology & Community Health*. 2006;60(4):290-297.
24. CDC. *HIV Surveillance Report, 2017*. Vol. 29. 2019. November 2018.
25. CDC. *Preexposure prophylaxis for the prevention of HIV infection in the United States—2017 Update: a clinical practice guideline*. 2018.
26. CDC. *Preexposure Prophylaxis for the Prevention of HIV Infection in the United States—2017 Update: A Clinical Practice Guideline*. CDC website 2018.
27. Golub SA, Myers JE. Next-Wave HIV Pre-Exposure Prophylaxis Implementation for Gay and Bisexual Men. *AIDS patient care and STDs*. 2019;
28. Grulich AE, Guy R, Amin J, et al. Population-level effectiveness of rapid, targeted, high-coverage roll-out of HIV pre-exposure prophylaxis in men who have sex with men: the EPIC-NSW prospective cohort study. *The lancet HIV*. 2018;5(11):e629-e637.
29. Medland NA, Grulich AE. HIV diagnoses in Australia fall as clinicians embrace pre-exposure prophylaxis. *AN INDEPENDENT REVIEW*. 2020:182.
30. Australasian Society of HIV VH, Medicine SH. *PrEP guidelines update: prevent HIV by prescribing PrEP*. ASHM Sydney; 2019.
31. Siegler AJ, Bratcher A, Weiss KM, et al. Location Location Location: An Exploration of Disparities in Access to Publicly Listed PrEP Clinics in the United States. *Annals of Epidemiology*. 2018;



## **Appendix. State-level (level-2) Medicaid Expansion Status**

| <b>State</b>         | <b>Sample population</b> | <b>Medicaid Expansion Status 2020</b> |
|----------------------|--------------------------|---------------------------------------|
| Alabama              | 1,461                    | Not expanded                          |
| Alaska               | 204                      | Fully expanded                        |
| Arizona              | 2,791                    | Conditionally Expanded                |
| Arkansas             | 830                      | Conditionally Expanded                |
| California           | 16,723                   | Fully expanded                        |
| Colorado             | 2,413                    | Fully expanded                        |
| Connecticut          | 1,137                    | Fully expanded                        |
| Delaware             | 340                      | Fully expanded                        |
| District of Columbia | 1,072                    | Fully expanded                        |
| Florida              | 9,654                    | Not expanded                          |
| Georgia              | 4,311                    | Not expanded                          |
| Hawaii               | 511                      | Fully expanded                        |
| Idaho                | 497                      | Fully expanded                        |
| Illinois             | 5,079                    | Fully expanded                        |
| Indiana              | 2,098                    | Conditionally Expanded                |
| Iowa                 | 912                      | Conditionally Expanded                |
| Kansas               | 776                      | Not expanded                          |
| Kentucky             | 1,432                    | Conditionally Expanded                |
| Louisiana            | 1,600                    | Fully expanded                        |
| Maine                | 371                      | Fully expanded                        |
| Maryland             | 1,944                    | Fully expanded                        |
| Massachusetts        | 2,816                    | Fully expanded                        |
| Michigan             | 2,745                    | Conditionally Expanded                |
| Minnesota            | 1,739                    | Fully expanded                        |
| Mississippi          | 744                      | Not expanded                          |
| Missouri             | 1,807                    | Not expanded                          |
| Montana              | 308                      | Fully expanded                        |
| Nebraska             | 594                      | Conditionally Expanded                |
| Nevada               | 1,412                    | Fully expanded                        |
| New Hampshire        | 413                      | Conditionally Expanded                |
| New Jersey           | 2,741                    | Fully expanded                        |
| New Mexico           | 822                      | Conditionally Expanded                |
| New York             | 11,010                   | Fully expanded                        |
| North Carolina       | 3,367                    | Not expanded                          |
| North Dakota         | 199                      | Fully expanded                        |
| Ohio                 | 3,652                    | Conditionally Expanded                |
| Oklahoma             | 1,163                    | Not expanded                          |
| Oregon               | 1,659                    | Fully expanded                        |
| Pennsylvania         | 4,192                    | Fully expanded                        |
| Puerto Rico          | 1,119                    | Fully expanded                        |
| Rhode Island         | 432                      | Fully expanded                        |
| South Carolina       | 1,504                    | Not expanded                          |

|    |               |        |                        |
|----|---------------|--------|------------------------|
| 1  |               |        |                        |
| 2  | South Dakota  | 192    | Not expanded           |
| 3  | Tennessee     | 2,005  | Not expanded           |
| 4  | Texas         | 11,750 | Not expanded           |
| 5  | Utah          | 1,285  | Conditionally Expanded |
| 6  | Vermont       | 193    | Fully expanded         |
| 7  | Virginia      | 2,757  | Fully expanded         |
| 8  | Washington    | 2,812  | Fully expanded         |
| 9  | West Virginia | 511    | Fully expanded         |
| 10 | Wisconsin     | 1,641  | Not expanded           |
| 11 | Wyoming       | 165    | Not expanded           |
| 12 |               |        |                        |
| 13 |               |        |                        |
| 14 |               |        |                        |
| 15 |               |        |                        |
| 16 |               |        |                        |
| 17 |               |        |                        |
| 18 |               |        |                        |
| 19 |               |        |                        |
| 20 |               |        |                        |
| 21 |               |        |                        |
| 22 |               |        |                        |
| 23 |               |        |                        |
| 24 |               |        |                        |
| 25 |               |        |                        |
| 26 |               |        |                        |
| 27 |               |        |                        |
| 28 |               |        |                        |
| 29 |               |        |                        |
| 30 |               |        |                        |
| 31 |               |        |                        |
| 32 |               |        |                        |
| 33 |               |        |                        |
| 34 |               |        |                        |
| 35 |               |        |                        |
| 36 |               |        |                        |
| 37 |               |        |                        |
| 38 |               |        |                        |
| 39 |               |        |                        |
| 40 |               |        |                        |
| 41 |               |        |                        |
| 42 |               |        |                        |
| 43 |               |        |                        |
| 44 |               |        |                        |
| 45 |               |        |                        |
| 46 |               |        |                        |
| 47 |               |        |                        |
| 48 |               |        |                        |
| 49 |               |        |                        |
| 50 |               |        |                        |
| 51 |               |        |                        |
| 52 |               |        |                        |
| 53 |               |        |                        |
| 54 |               |        |                        |
| 55 |               |        |                        |
| 56 |               |        |                        |
| 57 |               |        |                        |
| 58 |               |        |                        |
| 59 |               |        |                        |
| 60 |               |        |                        |

For peer review only

# BMJ Open

## Demographic, Clinical Guideline Criteria, Medicaid Expansion and State of Residency: A Multilevel Analysis of PrEP use on a Large US Sample

|                                 |                                                                                                                                                                                                                                                                                                                                                                                                                                                   |
|---------------------------------|---------------------------------------------------------------------------------------------------------------------------------------------------------------------------------------------------------------------------------------------------------------------------------------------------------------------------------------------------------------------------------------------------------------------------------------------------|
| Journal:                        | <i>BMJ Open</i>                                                                                                                                                                                                                                                                                                                                                                                                                                   |
| Manuscript ID                   | bmjopen-2021-055487.R2                                                                                                                                                                                                                                                                                                                                                                                                                            |
| Article Type:                   | Original research                                                                                                                                                                                                                                                                                                                                                                                                                                 |
| Date Submitted by the Author:   | 13-Jan-2022                                                                                                                                                                                                                                                                                                                                                                                                                                       |
| Complete List of Authors:       | Carneiro, Pedro; CUNY School of Public Health, Community Health and Health Policy<br>Mirzayi, Chloe; City University of New York; City University of New York, Department of Epidemiology and Biostatistics<br>Jones, Scott; Whitman-Walker Clinic<br>Rendina, Jonathon; Whitman-Walker Clinic; The George Washington University Milken Institute of Public Health, Department of Epidemiology<br>Groves, Christian; CUNY School of Public Health |
| <b>Primary Subject Heading</b>: | Public health                                                                                                                                                                                                                                                                                                                                                                                                                                     |
| Secondary Subject Heading:      | Health policy, HIV/AIDS, Sexual health                                                                                                                                                                                                                                                                                                                                                                                                            |
| Keywords:                       | PREVENTIVE MEDICINE, Public health < INFECTIOUS DISEASES, HIV & AIDS < INFECTIOUS DISEASES, Epidemiology < INFECTIOUS DISEASES                                                                                                                                                                                                                                                                                                                    |
|                                 |                                                                                                                                                                                                                                                                                                                                                                                                                                                   |

SCHOLARONE™  
Manuscripts

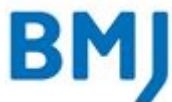

I, the Submitting Author has the right to grant and does grant on behalf of all authors of the Work (as defined in the below author licence), an exclusive licence and/or a non-exclusive licence for contributions from authors who are: i) UK Crown employees; ii) where BMJ has agreed a CC-BY licence shall apply, and/or iii) in accordance with the terms applicable for US Federal Government officers or employees acting as part of their official duties; on a worldwide, perpetual, irrevocable, royalty-free basis to BMJ Publishing Group Ltd ("BMJ") its licensees and where the relevant Journal is co-owned by BMJ to the co-owners of the Journal, to publish the Work in this journal and any other BMJ products and to exploit all rights, as set out in our [licence](#).

The Submitting Author accepts and understands that any supply made under these terms is made by BMJ to the Submitting Author unless you are acting as an employee on behalf of your employer or a postgraduate student of an affiliated institution which is paying any applicable article publishing charge ("APC") for Open Access articles. Where the Submitting Author wishes to make the Work available on an Open Access basis (and intends to pay the relevant APC), the terms of reuse of such Open Access shall be governed by a Creative Commons licence – details of these licences and which [Creative Commons](#) licence will apply to this Work are set out in our licence referred to above.

Other than as permitted in any relevant BMJ Author's Self Archiving Policies, I confirm this Work has not been accepted for publication elsewhere, is not being considered for publication elsewhere and does not duplicate material already published. I confirm all authors consent to publication of this Work and authorise the granting of this licence.

1

1 **Demographic, Clinical Guideline Criteria, Medicaid Expansion and State of Residency: A**

2 **Multilevel Analysis of PrEP use on a Large US Sample**

3 Pedro B. Carneiro<sup>1</sup>, Chloe Mirzayi<sup>2</sup>, Scott Jones<sup>3</sup>, H. Jonathon Rendina<sup>3,4</sup>, Christian Grov<sup>1,2</sup>

4  
5  
6  
7  
8  
9  
10  
11 1. Department of Community Health and Health Policy, CUNY Graduate School of Public Health  
12 and Health Policy, New York, NY

13  
14  
15 2. CUNY Institute for Implementation Science in Population Health, New York, NY

16  
17 3. Whitman-Walker Institute, Washington, DC

18  
19 4. Department of Epidemiology, Milken Institute School of Public Health, George Washington  
20 University, Washington, DC

21  
22  
23  
24  
25 10 **Corresponding author:** Pedro B Carneiro, MPH. Graduate Student. CUNY Graduate School of  
26  
27 Public Health and Health Policy 55 W. 125th St., 7<sup>th</sup> Floor mailroom (c/o: Dr. C Grov). New  
28  
29 York, NY 10027, USA. E-mail: [pedro.carneiro74@sphmail.cuny.edu](mailto:pedro.carneiro74@sphmail.cuny.edu)

30  
31  
32  
33  
34  
35 15 **Main manuscript word count:** 3202 words

36  
37  
38  
39  
40  
41 18 **Keywords:** PrEP uptake, biomedical prevention, multilevel analysis, health disparities, HIV  
42  
43 prevention

2

**Abstract**

**Objective:** To explore the association of clinical guideline-related variables, demographics and Medicaid expansion on PrEP uptake in one of the largest US sample of MSM and TGNB people ever analyzed.

**Methods:** We cross-sectionally analyzed predictors of current PrEP use using demographic and HIV risk-related variables (level-1), as well as state-level variables (level-2) (i.e, Medicaid Expansion status). We further explored the role state of residence plays in PrEP uptake disparities across the US.

**Results:** We found that the odds of PrEP use were significantly greater in older age, white, cisgender men. Moreover, individuals who reported recent PEP use, a recent sexually transmitted infection diagnosis and recent drug use were significantly more likely to report PrEP use. Lastly, we found **that** the median odds of PrEP use between similar individuals from different states were 1.40 for the ones living in the Medicaid expansion states, compared to those not living in Medicaid expansion states. State of residence did not play a significant role in explaining PrEP disparities overall.

**Conclusion:** Our analysis showed that PrEP use is less common in communities standing to benefit the most from it – young MSM and TGNB of color. However, individuals meeting federal guidelines for PrEP were significantly more likely to use PrEP. Though we found a positive association between living in Medicaid expansion states and PrEP use; that variable, as well as one's state of residency, were not suitable to explain variations in PrEP use in the US.

3

**Article summary**

## Strengths and limitations of this study

1. This study reports on patient-level risk factors of PrEP use in a sample of over 6,000 cisgender men and transgender people who have sex with men across the United States, representing all states.
2. This study uses multi-level modelling analysis to understand the role of state-level medicaid-expansion alongside individual-level predictors of PrEP use.
3. This study includes the magnitude of clinical guidelines criteria predictors of PrEP use in a US national sample, and the role of Medicaid expansion on PrEP use.
4. This study was conducted in 2017 and 2018, and the implementation of PrEP across the United States is ever growing and changing.
5. The study uses self-reported cross-sectional data, and causal inference cannot be drawn from the analysis

4

## 58 Introduction

59 In 2012, the US Food and Drug Administration (FDA) approved the first daily HIV  
60 preexposure prophylactic (PrEP) medication in the form of tenofovir disoproxil fumarate and  
61 emtricitabine (TDF/FTC).<sup>1</sup> Following its approval, the CDC estimated that as many as 1.2  
62 million Americans would benefit from taking the regimen.<sup>2</sup> By 2017, only approximately 80,000  
63 prescriptions were filled by unique HIV-negative users.<sup>3</sup>

64 Recent estimations of PrEP use in the general population suggest that as many as 200,000  
65 individuals have initiated or persisted in PrEP year-over-year since the 2012 FDA approval  
66 through 2020,<sup>4</sup> a number still lower than expected.<sup>2</sup> Researchers in the US have reported PrEP  
67 discontinuation rates of up to 60% following six-months of initiation.<sup>5-8</sup> An analysis of  
68 persistence (i.e., continuous use) data using prescription drug records in the US from 2012-2017  
69 found that PrEP persistence was only 14-months on average, and significantly differed by race,  
70 age group and insurance status.<sup>9</sup> Understanding this issue is critical for communities at-risk for  
71 HIV, especially Black and Latinx MSM communities.<sup>10</sup> A limitation of current PrEP use reports  
72 in the US is their reliance on pharmacy claims data,<sup>3</sup> or multiple different sources to obtain  
73 estimates,<sup>4</sup> limiting one's ability to account for confounding variables, like HIV-related risk  
74 factors. They also limit a deeper exploration of complex questions by limiting the study unit to a  
75 prescription claim, for example, rather than one individual. There is an immediate need to  
76 develop solutions to mitigate both issues - the overall uptake and persistence in PrEP, and the  
77 observed racial disparity in communities standing to benefit the most from it.

78 A prominent issue impacting PrEP uptake in the US is coverage, both financial coverage  
79 in the form of health insurance, and geographic coverage in the form of access to a provider who  
80 is competent and accepts your medical coverage. Issues related to having health insurance



1  
2  
3 81 coverage or being able to afford costs associated with medical care are widely reported  
4  
5 82 throughout the PrEP literature,<sup>11-14</sup> and they relate to an individual inability to pay for costs  
6  
7  
8 83 associated with taking PrEP. However, financial coverage is also managed at the state-level,  
9  
10 84 through state-run Medicaid programs and drug assistance programs (DAP), which grant some  
11  
12 85 access and affordability to PrEP. Patients enrolled in Medicaid have mixed levels of PrEP access,  
13  
14 86 with enrollees with incomes under 150% of the federal poverty level (FPL) receiving PrEP for  
15  
16 87 nearly free due to federal laws limiting costs.<sup>15</sup> In 2010, the affordable care act (ACA) provided  
17  
18 88 states with the ability to expand Medicaid programs to adults aged 65 and younger with incomes  
19  
20 89 138% of the FPL (about \$17,000 a year) and below.<sup>15</sup> Several states have chosen to expand  
21  
22 90 Medicaid, and reports have linked increases in PrEP use to these expansions,<sup>16-18</sup> suggesting that  
23  
24 91 state variation in PrEP use may explain some of the disparities observed in the population at-  
25  
26 92 large. Thus far, the issue of Medicaid expansion has only been explored on the aggregate level,  
27  
28 93 limiting studies to measures of association which only informs on effect size but not on the  
29  
30 94 impact of the variable on the distribution of PrEP across communities. Understanding the impact  
31  
32 95 of Medicaid expansion on a population-level can support a better understanding of the  
33  
34 96 complexities in regional disparities in PrEP use, for example, by exploring the association of  
35  
36 97 Medicaid expansion and racial disparities in PrEP uptake. Furthermore, it seems imperative to  
37  
38 98 understand whether the state of residency of a particular individual is significant to explain PrEP  
39  
40 99 uptake.

41  
42  
43  
44  
45  
46  
47 100 Using the combined the screening/enrollment data from two similar-in-scope U.S.  
48  
49 101 national cohorts, we created one of the largest national samples of MSM and transgender and  
50  
51 102 gender non-binary (TGNB) individuals who have sex with men. Using a mixed-effect multilevel  
52  
53 103 logistic analysis (MLA) approach, we analyzed predictors of current PrEP use using  
54  
55  
56  
57  
58  
59  
60

6

104 demographic and HIV risk-related variables (level-1), as well as state-level variables (level-2)  
105 (i.e, Medicaid Expansion status).

## 106 **Methods**

### 107 **About the studies**

108 The *Together 5,000* and *UNITE* studies are both U.S. national cohorts longitudinally  
109 following sexual and gender minorities at-risk for HIV. Both cohorts are similar in scope,  
110 exploring sexual behavior and PrEP uptake. Details on both studies have been described  
111 elsewhere.<sup>19,20</sup> Briefly, each used advertisements on geospatial sexual networking apps to recruit  
112 MSM and TGNB people who have sex with men across the U.S. to enroll in longitudinal  
113 assessments. During each study's enrollment phase, app-users were presented with an ad for the  
114 study. Those interested were directed to a brief screening (i.e., eligibility) survey on their devices  
115 browser. The present analysis utilizes the reconciled screening data from each study dataset (i.e.,  
116 all variables that were identical across both screening surveys). Both studies enrolled samples in  
117 2017 and 2018.

118 The sample's composition, which was not designed to be nationally representative, is  
119 nonetheless one of the largest national surveys of sexual minorities, consisting of 157,035  
120 responses, with 27% of the responses being from the *Together 5,000* study and the remainder  
121 from *UNITE*. Our current analysis, exploring individual- and state-level predictors of current  
122 PrEP use, was limited to individuals not living with HIV, and those residing in one of the 50  
123 states, Washington, DC, or Puerto Rico – hereby referred to as “states.” Our decision to limit the  
124 analytical sample to these states was based on state-level data availability. Our final sample was  
125 inclusive of 123,905 (79%) cisgender men and TGNB people who have sex with men.

### 126 **Individual-level variables (level-1)**

7

1  
2  
3 127 **Demographics.** Participants were grouped according to their age (under 24 years old, 25-  
4  
5 128 29 years old, 30-49 years old, 50+ years old), gender identity (male, female (assigned male at  
6  
7 129 birth), transgender person, something else), and race/ethnicity (Black, Latinx, white, multiracial,  
8  
9 130 other).

11  
12 131 **Current PrEP use.** Participants were asked about their PrEP status and current users  
13  
14 132 were identified based on their self-reported status (current use/not).

15  
16  
17 133 **Clinical criteria guideline variables.** In both studies, participants were asked about post-  
18  
19 134 exposure prophylaxis (PEP) use in the prior 12 months, drug use in the past three months (i.e.,  
20  
21 135 cannabis, cocaine, stimulants, methamphetamine, inhalants, sedatives, GHB, MDMA,  
22  
23 136 hallucinogen), and whether they received a sexually transmitted infection (STI) diagnosis (i.e.,  
24  
25 137 syphilis, chlamydia or gonorrhea) in the past 12 months. Based on their answers, we developed  
26  
27 138 three dichotomous (yes/no) variables indicating their PEP, drug use, and STI experiences within  
28  
29 139 the timeframes noted.

### 30 31 32 33 140 **State-level variables (level-2)**

34  
35 141 **Medicaid expansion status.** We created a three-level variable to indicate the state's  
36  
37 142 Medicaid expansion status as of 2020. We categorized as fully expanded, not expanded, or  
38  
39 143 conditionally expanded. Conditional expansion includes any alternative Medicaid expansion  
40  
41 144 model differing from the Affordable Care Act (ACA) format and one state that started expansion  
42  
43 145 in 2020 (i.e., Nebraska).<sup>21</sup>

### 44 45 46 47 146 **Patient and Public Involvement**

48  
49 147 Patients were not involved in the development of this study

### 50 51 148 **Ethics Approval Statement**

8

1  
2  
3 149 Procedures for each of the cohort studies, as well as those to merge de-identified datasets  
4  
5 150 were reviewed and approved by the CUNY Internal Review Board (Protocol number: 2019-  
6  
7  
8 151 0334).

152

### 153 **Analysis**

154 Our analysis included a descriptive assessment of our sample's demographics and HIV-  
155 clinical guideline-related variables, as well as a description of state-level variables. Next, we  
156 built a multilevel logistic multivariable mixed-effects regression model predicting current PrEP  
157 use (yes/no), using individual- (level-1) and state-level (level-2) predictors. We calculated the  
158 fixed effects odds ratio and 95% confidence interval of our fixed-effect variables, as well as the  
159 random effect intraclass correlation coefficients (ICC), the median odds ratios (MOR) of each of  
160 our models, and the interval odds ratio (IOR-80) of our fixed-effect level-2 variables – random  
161 effect components were calculated via previously reported equations and methods.<sup>22,23</sup> Our  
162 model-building approach was the following, first, we constructed a null model (model 1) in order  
163 to calculate the ICC and determine the variance in PrEP use accounted by an individual's state of  
164 residency. After, we built a model with level-1 variables (model 2) to explore the fixed effects of  
165 individual-level factors on current PrEP use. Finally, we built a full mixed effect multilevel  
166 logistic model (model 3) with all variables in both levels. Our analysis was conducted using the  
167 PROC GLIMMIX procedure with one random effect at the intercept, a binary distribution and a  
168 logit link on SAS 9.4. We used Satterthwaite degrees of freedom. Random effects components  
169 were calculated manually.<sup>22,23</sup> Given our large sample size, we analyzed our intervals of  
170 confidence and effect sizes when discussing statistical significance.

### 171 **Results**

9

172 Our US sample varied demographically with over a quarter being under 24 years old,  
 173 13% were over 50 years of age, about 1.7% were transgender people, and 40% were either  
 174 Black, Latinx or Multiracial. About 8% used PEP in the past 12 months, 60% used drugs in the  
 175 past 3 months, and 13% had a positive STI results in the past 12 months. In total, 15% of the  
 176 sample were current PrEP users, and the proportion of PrEP use was significantly greater in  
 177 adults older than 29 y.o. (68% v. 51%), white participants (59% v. 53%), people who recently  
 178 used PEP (23% v 5%), who recently used drugs (74% v. 58%), and those who reported a recent  
 179 STI diagnosis (29% v. 10%). Table 1 provides further details about our sample individual-level  
 180 (level-1) variables. States-level characteristics (level-2) also varied greatly with about 54%  
 181 having fully expanded Medicaid, and 22% having conditionally expanded. We provided this list  
 182 as an appendix (See Supplement 1).

**Table 1. Demographics and Clinical Guideline-related Characteristics of National Sample of Cisgender Men and Transgender People who have Sex with Men (level-1)**

| Variables                                | <i>n</i> | %     | <i>Not currently on PrEP</i> |      | <i>Current PrEP user</i> |      |       |         |
|------------------------------------------|----------|-------|------------------------------|------|--------------------------|------|-------|---------|
|                                          | 123905   |       | 104330                       | 84%  | 18126                    | 15%  |       |         |
| <b>Age group</b>                         |          |       |                              |      |                          |      | 2711  | <0.0001 |
| 24 & under                               | 32852    | 26.5% | 30694                        | 29%  | 2158                     | 12%  |       |         |
| 25-29                                    | 26347    | 21.3% | 22471                        | 22%  | 3876                     | 21%  |       |         |
| 30-49                                    | 48904    | 39.5% | 39370                        | 38%  | 9534                     | 53%  |       |         |
| 50+                                      | 15802    | 12.8% | 13042                        | 13%  | 2760                     | 15%  |       |         |
| <b>Gender identity (<i>n</i>=123453)</b> |          |       |                              |      |                          |      | 69.81 | <0.0001 |
| Male                                     | 120861   | 97.9% | 102827                       | 99%  | 18034                    | 99%  |       |         |
| Female (Trans woman)                     | 388      | 0.3%  | 367                          | 0.4% | 21                       | 0.1% |       |         |
| Transgender Person                       | 1959     | 1.6%  | 1759                         | 2%   | 200                      | 1.1% |       |         |
| Something else                           | 245      | 0.2%  | 225                          | 0.2% | 20                       | 0.1% |       |         |
| <b>Race</b>                              |          |       |                              |      |                          |      | 280.9 | <0.0001 |
| Black                                    | 14237    | 11.5% | 12524                        | 12%  | 1713                     | 9%   |       |         |

10

|                                                         |        |       |       |     |       |     |              |
|---------------------------------------------------------|--------|-------|-------|-----|-------|-----|--------------|
| Latinx                                                  | 23999  | 19.4% | 20894 | 20% | 3105  | 17% |              |
| White                                                   | 65941  | 53.2% | 55210 | 53% | 10731 | 59% |              |
| Multiracial                                             | 11845  | 9.6%  | 10240 | 10% | 1605  | 9%  |              |
| Other                                                   | 7883   | 6.4%  | 6709  | 6%  | 1174  | 6%  |              |
| <b>PEP in past 12 months<br/>(n= 123552)</b>            |        |       |       |     |       |     | 6616 <0.0001 |
| Yes                                                     | 9713   | 7.8%  | 5542  | 5%  | 4171  | 23% |              |
| No                                                      | 113839 | 91.9% | 99717 | 96% | 14122 | 78% |              |
| <b>Drug use in past 3<br/>months (n= 122456)</b>        |        |       |       |     |       |     | 1615 <0.0001 |
| Yes                                                     | 73837  | 59.6% | 60464 | 58% | 13373 | 74% |              |
| No                                                      | 48619  | 39.2% | 43866 | 42% | 4753  | 26% |              |
| <b>STI diagnosis in past<br/>12 months (n = 122734)</b> |        |       |       |     |       |     | 5296 <0.0001 |
| Yes                                                     | 15605  | 12.6% | 10280 | 10% | 5325  | 29% |              |
| No                                                      | 107129 | 86.5% | 94292 | 90% | 12837 | 71% |              |

184

11

1  
2  
3 185 Our regression model results are presented on Table 2, we report here the findings of our model  
4  
5 186 3. The odds of current PrEP use for all age groups were significantly higher when compared to  
6  
7 187 people 24 years old and younger, with individuals 25-29 having 2.2 greater odds (aOR = 2.21,  
8  
9 188 95% CI: 2.15 - 2.28), 30-39 having 3.2 greater odds (aOR = 3.20, 95% CI: 3.12 - 3.29) and those  
10  
11 189 50 years old and older having 2.9 greater odds (aOR = 2.91, 95% CI: 2.82 - 3.01) of current PrEP  
12  
13 190 use. All races had significantly lower odds current PrEP use when compared to white  
14  
15 191 participants, with Black participants having 27% lower odds (aOR = 0.73, 95% CI: 0.71 – 0.76),  
16  
17 192 26% lower for Latinx (aOR = 0.74, 95% CI: 0.73 – 0.76), and 21% lower for multiracial  
18  
19 193 individuals (aOR = 0.79, 95% CI: 0.76 – 0.81). Those who identified as female (aOR = 0.44,  
20  
21 194 95% CI: 0.35 – 0.56) or as a transgender person (aOR = 0.71, 95% CI: 0.66 – 0.77) had 66% and  
22  
23 195 29% significantly lower odds of being current PrEP users than those identifying as male.  
24  
25 196 Individuals who reported PEP use in the past 12 months (aOR = 3.94, 95% CI: 3.85 – 4.04), drug  
26  
27 197 use in the past 3 months (aOR = 1.73, 95% CI: 1.70 – 1.76) or were diagnosed with an STI in the  
28  
29 198 previous 12 months (aOR = 3.34, 95% CI: 3.27 – 3.42) had significantly greater odds of being  
30  
31 199 current PrEP users. On the state level, individuals living in states with no Medicaid expansion  
32  
33 200 had 31% lower odds of being current PrEP users (aOR = 0.69, 95% CI: 0.54 – 0.88), and those  
34  
35 201 living in conditional Medicaid expansion state had 27% lower odds of being current PrEP users  
36  
37 202 than individuals living in states with full expansion (aOR = 0.73, 95% CI: 0.56 – 0.95). For the  
38  
39 203 states with no expansion (aOR= 0.69) the IOR-80 was between 0.37 – 1.30, and for those  
40  
41 204 conditional expansion (aOR=0.73) it was between 0.39 – 1.38. The median odds of PrEP use  
42  
43 205 between individuals with identical individual characteristics but from different states were 1.40  
44  
45 206 for the ones living in the Medicaid expansion states, compared to those not living in Medicaid  
46  
47 207 expansion states. Overall, the state of residency accounted for about 6% in the variance of PrEP  
48  
49  
50  
51  
52  
53  
54  
55  
56  
57  
58  
59

12

208 use overall, and after accounting for fixed-effects of individuals and Medicaid expansion, it  
 209 accounts for only 4% of the remaining variance.

**Table 2. Multilevel Mixed-Effects Regression Models Predicting Current PrEP Use**

| Fixed-Effects Variables                   | Model 1<br>(Null) | Model 2 | 95% CI       | Model 3 | 95% CI       |
|-------------------------------------------|-------------------|---------|--------------|---------|--------------|
| <b>Demographics</b>                       |                   |         |              |         |              |
| Age group (24 & Under)                    |                   |         |              |         |              |
| 25-29                                     |                   | 2.21    | (2.09, 2.35) | 2.21    | (2.15, 2.28) |
| 30-49                                     |                   | 3.20    | (3.04, 3.37) | 3.19    | (3.04, 3.37) |
| 50+                                       |                   | 2.91    | (2.73, 3.1)  | 2.9     | (2.82, 3.01) |
| Race/Ethnicity (White)                    |                   |         |              |         |              |
| Black                                     |                   | 0.73    | (0.69, 0.78) | 0.73    | (0.71, 0.76) |
| Latinx                                    |                   | 0.75    | (0.71, 0.78) | 0.74    | (0.73, 0.76) |
| Multiracial                               |                   | 0.79    | (0.74, 0.84) | 0.79    | (0.76, 0.81) |
| Other                                     |                   | 0.82    | (0.76, 0.88) | 0.82    | (0.79, 0.85) |
| Gender Identity (Male)                    |                   |         |              |         |              |
| Female (Trans woman)                      |                   | 0.44    | (0.28, 0.7)  | 0.44    | (0.35, 0.56) |
| Something else                            |                   | 0.44    | (0.26, 0.73) | 0.42    | (0.33, 0.56) |
| Transgender person                        |                   | 0.71    | (0.61, 0.84) | 0.71    | (0.66, 0.77) |
| <b>Risk Variables</b>                     |                   |         |              |         |              |
| PEP use in past 12 months (ref: No)       |                   | 3.94    | (3.76, 4.14) | 3.94    | (3.85, 4.04) |
| STI diagnosis in past 12 months (ref: No) |                   | 3.34    | (3.21, 3.48) | 3.34    | (3.27, 3.42) |
| Drug use in past 3 months (ref: No)       |                   | 1.73    | (1.67, 1.8)  | 1.73    | (1.7, 1.76)  |
| <b>State-level Variable</b>               |                   |         |              |         |              |
| Medicaid Expansion status                 |                   |         |              |         |              |
| No Expansion                              |                   |         |              | 0.69    | (0.54, 0.88) |
| Conditional Expansion                     |                   |         |              | 0.73    | (0.56, 0.95) |
| <b>Random Effect Components</b>           |                   |         |              |         |              |
| Interval Odds Ratio (IOR-80)              |                   |         |              |         |              |
| Medicaid Expansion status                 |                   |         |              |         |              |
| No Expansion                              |                   |         |              | (0.37 - | 1.30)        |
| Conditional Expansion                     |                   |         |              | (0.39 - | 1.38)        |
| Intercept Variance                        | 0.21              | 0.15    |              | 0.12    |              |
| Interclass Correlation Coefficient (ICC)  | 0.06              | 0.04    |              | 0.04    |              |
| Median Odds Ratio (MOR)                   | 1.54              | 1.45    |              | 1.40    |              |

210



## 211 Discussion

212 In this US national survey with over 120,000 responses, we found that older age, white  
213 race, cisgender male identity, and meeting objective criteria per current guidelines were positive  
214 predictors of current PrEP use. Previous epidemiologic surveillance reports exploring PrEP  
215 uptake in the US using prescription drug data have found similar demographic outcomes.<sup>3</sup>  
216 Furthermore, though a state's Medicaid expansion status significantly predicted the likelihood an  
217 individual is currently taking PrEP, these effects were weak across states and did not explain  
218 variation in PrEP use in our analysis. Our study represents one of the largest U.S. national  
219 samples to explore multilevel predictors of current PrEP use, using individual and risk-related  
220 variables, and state-level variables.

221 Our findings affirmed the demographic disconnect between HIV and PrEP epidemiology  
222 in the US. While HIV incidence is disproportionately distributed in Black and Brown MSM and  
223 TGNB youth communities,<sup>24</sup> PrEP was most commonly used by older white cisgender men.<sup>3</sup>  
224 These effects persisted without change in effect size after controlling for Medicaid expansion.  
225 This contrast cannot be overlooked for the racial inequities in HIV outcomes in the US are  
226 historic and enduring. Aside from denying protection to communities who stand to benefit the  
227 most from PrEP, demographic inequities in access to HIV prevention interventions can  
228 significantly increase the magnitude of this racial inequity. Nevertheless, PrEP use was much  
229 more common among those who would have otherwise benefited from its protection most, such  
230 as those who had taken PEP, been recently treated for an STI, or reported drug use. This scenario  
231 presents a critical consideration to the successes, and possible limitations, of current PrEP  
232 guidelines in the US.<sup>25</sup> The guidelines, set forth by the CDC, have a strong focus on objective  
233 risk (i.e., recent bacterial STI, history of inconsistent or no condom use, sharing injection

14

1  
2  
3 234 equipment).<sup>26</sup> To that extent, our results demonstrated that guidelines can be successful in  
4  
5 235 translating theory to practice: participants who reported any recent guideline criteria had as much  
6  
7  
8 236 as 3 times the odds of PrEP use than otherwise. However, the persistent demographic disconnect  
9  
10 237 between *who gets HIV* and *who takes PrEP* requires discussing the limitations of recommending  
11  
12 238 PrEP solely based on objective risk. Researchers in the US have previously speculated about the  
13  
14 239 role an extension of guidelines would have in impacting PrEP uptake.<sup>27</sup> Using the premise of  
15  
16 240 determining “good fit” of PrEP for a given patient’s goals, instead of “eligibility” for PrEP they  
17  
18 241 suggest PrEP may be used to reduce HIV-related anxiety during sex and increase inter-partner  
19  
20 242 intimacy.<sup>27</sup> The CDC and other agencies overseeing clinical guidelines should immediately  
21  
22 243 consider heeding such advice. Australia, for example, is considered a model-jurisdiction for  
23  
24 244 PrEP implementation, with several reports associating community PrEP uptake to substantial  
25  
26 245 declines in HIV incidence.<sup>28,29</sup> The guidelines for offering PrEP in Australia are much broader  
27  
28 246 and comprehensive than those of the CDC, including reasons for offering PrEP such as “*when a*  
29  
30 247 *person plans to travel during which time they anticipate that they will be having condomless sex*  
31  
32 248 *with casual partners,*” and “*when a person reports being so anxious about HIV infection that it*  
33  
34 249 *may prevent them from having regular HIV testing, or engaging in any form of anal sex.*”<sup>30</sup> A  
35  
36 250 more inclusive set of clinical recommendations may have a much greater impact on PrEP uptake  
37  
38 251 than traditional community outreach strategies; agencies and organizations with jurisdiction over  
39  
40 252 these guidelines should consider doing so.

41  
42 253 In exploring the role of a state’s Medicaid expansion in predicting current PrEP use, we  
43  
44 254 found mixed results. Appendix 1 provides a detailed description of the state-level sample and  
45  
46 255 some important demographic breakdown, as well as each state’s Medicaid expansion status at the  
47  
48 256 time of the study. The median OR (MOR = 1.40) suggests that at least 50% of the odds of PrEP  
49  
50  
51  
52  
53  
54  
55  
56  
57  
58  
59  
60

15

1  
2  
3 257 use between multiple pairs of identical individuals living in different states are 40% greater or  
4  
5  
6 258 higher, on average, for individuals living in states with Medicaid expansion. This finding is in  
7  
8 259 line with previously reported effect estimates of PrEP use in relation to Medicaid expansion.<sup>16-18</sup>  
9  
10 260 However, our final model ICC indicated that the state of residency of a given participant  
11  
12 261 accounted for only 4% of the variance of PrEP use in our analysis, and the IOR-80 for our  
13  
14 262 Medicaid expansion variables measure of association (i.e., odds ratio) included the null value - 1.  
15  
16  
17 263 In MLA, the inclusion of the null value on the IOR-80 indicates that the variable was not  
18  
19 264 relevant to understanding the state-level variation in an individual predisposition to use PrEP.<sup>23</sup>  
20  
21 265 Furthermore, the positive MOR observed in our analysis must be understood in light of the small  
22  
23 266 ICC presented in our model, though there may have been strong differences between two  
24  
25 267 individuals from different states tendency to use PrEP, there was not enough variation between  
26  
27 268 states for Medicaid expansion to impact PrEP use. In MLA, the estimate of the ICC is highly  
28  
29 269 dependent on the area-level variable variance (e.g. state-level),<sup>22</sup> which suggests that perhaps a  
30  
31 270 smaller area-level analysis, like zip code or county-level, may be better suited to understand the  
32  
33 271 impact of Medicaid expansion on PrEP uptake. Previously reported regional disparities in PrEP  
34  
35 272 use seems to suggest this as well. For example, though Medicaid expansion has been associated  
36  
37 273 with increased PrEP use, a majority of states have been found to have less than one PrEP-  
38  
39 274 providing clinic per 100,000 people.<sup>31</sup> A narrower area of analysis, using MLA, may be  
40  
41 275 advisable to explore how much geographic region explains disparities in PrEP use, and to  
42  
43 276 explore the question about Medicaid expansion more effectively. The latter analysis, in fact,  
44  
45 277 provides a better health equity framing to our question, because communities of color often live  
46  
47 278 in smaller enclaves, and using the entire of a state area may dissolve the true impact of the state's  
48  
49 279 policy in these communities.  
50  
51  
52  
53  
54  
55  
56  
57  
58  
59

16

**280 Limitations:**

281 Our findings must be understood in light of several limitations. First, our data were  
282 collected via self-report and may be subjected to social desirability bias. Several demographic  
283 variables that could further influence PrEP use were not measured such as health insurance  
284 status, income, and other social determinants of health. Further, our outcome variable (current  
285 PrEP use) In our analysis we did not control from insurance type, for example, rather we  
286 explored the population-level effect of living in a Medicaid expansion state. It may be relevant to  
287 oversample patients receiving Medicaid and control for insurance information in future analysis.

288 The time our data was collected (2017-2018) is an additional limitation, and the relevance  
289 of the findings to the field of PrEP uptake might seem none. We call the reader's attention to the  
290 wholesome numbers of PrEP users reported in the United States – approximately 200,000 – a  
291 stagnant number since then until now.<sup>8</sup> We believe our findings provide some value to the  
292 question as to whether Medicaid expansion, as a variable, has an impact on an individual  
293 decision to start PrEP.

294 Lastly, the parent studies of our dataset recruited participants using similar strategies that  
295 may have resulted in the same participants responding to both surveys. We note that we treated  
296 each individual response as independent. Although we cannot ascertain precisely the amount of  
297 overlap of participants across surveys, the studies' recruitment strategies utilized multiple  
298 applications platforms, each of which has millions of daily users. Therefore, the relative pool of  
299 available participants is several times the magnitude of those who actually took our surveys.

**300 Conclusion:**

301 Our analysis showed that PrEP use is less common in communities standing to benefit the  
302 most from it – young MSM and TGNB of color. However, individuals meeting federal

17

1  
2  
3 303 guidelines for PrEP were significantly more likely to use PrEP. Updating guidelines may provide  
4  
5 304 a strong avenue to improve uptake and reduce racial disparities. Additionally, individuals living  
6  
7 305 in states where Medicaid was expanded were similarly more likely to use PrEP, however we did  
8  
9 306 not find that this variable was significant to explain state-level differences in PrEP use.  
10  
11  
12  
13  
14  
15  
16  
17  
18  
19  
20  
21  
22  
23  
24  
25  
26  
27  
28  
29  
30  
31  
32  
33  
34  
35  
36  
37  
38  
39  
40  
41  
42  
43  
44  
45  
46  
47  
48  
49  
50  
51  
52  
53  
54  
55  
56  
57  
58  
59  
60

18

1  
2  
3 318 **Acknowledgements:** We are thankful to participants for their time as well as other members of  
4  
5 319 the *Together 5000* study team. We gratefully acknowledge the contributions of all our  
6  
7 320 participants within the *UNITE* study for their time and feedback. We would like to thank all the  
8  
9 321 staff, students, and interns who made this study possible, with particular thanks to Ruben  
10  
11 322 Jimenez, Brian Salfas, Dr. Ali Talan, and Nico Tavella. We are grateful for the time and  
12  
13 323 contributions of Dr. Mark Pandori and the Alameda County Public Health Laboratory. We would  
14  
15 324 also like to thank collaborators, Drs. Carlos Rodriguez-Díaz and Brian Mustanski. . Data  
16  
17 325 collection for this study was conducted at Hunter College of the City University of New York  
18  
19 326 (CUNY), and affiliations reflect authors' institutions at the time of the most recent manuscript  
20  
21 327 submission, which were not directly involved in the human subjects' portion of the research.

#### 22 328 **Authorship contribution statement**

23  
24 329 PC, and CG conceptualized the paper, with PC performing the main analysis - both reviewed  
25  
26 330 multiples drafts and contributed to each section of the paper. CM performed the initial bivariate  
27  
28 331 analysis, extracted the data, and provided valuable data analysis and variable development  
29  
30 332 feedback. SJ Developed the dataset, conceptualized the variables, and reviewed multiple drafts  
31  
32 333 of the manuscript. JR provided key methodology feedback, and analytical guidance.  
33  
34 334 Additionally, JR helped with the interpretation of results.

#### 35 335 **Data Sharing Statement**

36 336 No additional data available

#### 37 337 **Author(s') disclosure statement(s)**

38 338 All authors report no conflict of interest.

#### 39 339 **Funding statement**

40 340

19

1  
2  
3 341 This work was supported by the National Institutes for Health grant number UH3 AI 133675 (Groves) and  
4  
5 342 the National Institute on Mental Health, Eunice Kennedy Shriver National Institute on Child Health and  
6  
7 343 Human Development, and National Institute on Drug Abuse (UG3/UH3-AI133674, PI: Rendina).  
8

9 344  
10 345  
11 346  
12 347  
13 348  
14 349  
15 350  
16  
17  
18  
19  
20  
21  
22  
23  
24  
25  
26  
27  
28  
29  
30  
31  
32  
33  
34  
35  
36  
37  
38  
39  
40  
41  
42  
43  
44  
45  
46  
47  
48  
49  
50  
51  
52  
53  
54  
55  
56  
57  
58  
59  
60

For peer review only

- 1  
2  
3 351  
4 352 References  
5 353 1. Roehr B. FDA approves first drug to prevent HIV infection. *BMJ: British Medical Journal (Online)*.  
6 354 2012;345  
7 355 2. Smith DK, Van Handel M, Wolitski RJ, et al. Vital signs: estimated percentages and numbers of  
8 356 adults with indications for preexposure prophylaxis to prevent HIV acquisition—United States, 2015.  
9 357 *Morbidity and Mortality Weekly Report*. 2015;64(46):1291-5.  
10 358 3. Ya-lin AH, Zhu W, Smith DK, Harris N, Hoover KW. HIV Preexposure Prophylaxis, by Race and  
11 359 Ethnicity—United States, 2014–2016. *Morbidity and Mortality Weekly Report*. 2018;67(41):1147.  
12 360 4. AVAC. PrEPWatch. 2020. <https://www.prepwatch.org/country/united-states/>  
13 361 5. Marcus JL, Hurley LB, Hare CB, et al. Preexposure prophylaxis for HIV prevention in a large  
14 362 integrated health care system: adherence, renal safety, and discontinuation. *Journal of acquired immune*  
15 363 *deficiency syndromes (1999)*. 2016;73(5):540.  
16 364 6. Morgan E, Ryan DT, Newcomb ME, Mustanski B. High rate of discontinuation may diminish PrEP  
17 365 coverage among young men who have sex with men. *AIDS and Behavior*. 2018;22(11):3645-3648.  
18 366 7. Scott HM, Spinelli M, Vittinghoff E, et al. Racial/Ethnic and HIV risk category disparities in PrEP  
19 367 discontinuation among patients in publicly-funded primary care clinics. *AIDS*. 2019;  
20 368 8. Holloway I, Dougherty R, Gildner J, et al. PrEP uptake, adherence, and discontinuation among  
21 369 California YMSM using geosocial networking applications. *Journal of acquired immune deficiency*  
22 370 *syndromes (1999)*. 2017;74(1):15.  
23 371 9. Huang Y-LA, Tao G, Smith DK, Hoover KW. Persistence with human immunodeficiency virus pre-  
24 372 exposure prophylaxis in the United States, 2012–2017. *Clinical Infectious Diseases*. 2021;72(3):379-385.  
25 373 10. Hess KL, Hu X, Lansky A, Mermin J, Hall HI. Lifetime risk of a diagnosis of HIV infection in the  
26 374 United States. *Annals of epidemiology*. 2017;27(4):238-243.  
27 375 11. Mayer KH, Agwu A, Malebranche D. Barriers to the Wider Use of Pre-exposure Prophylaxis in the  
28 376 United States: A Narrative Review. *Advances in Therapy*. 2020;37(5):1778-1811.  
29 377 12. Golub SA, Gamarel KE, Rendina HJ, Surace A, Lelutiu-Weinberger CL. From efficacy to  
30 378 effectiveness: facilitators and barriers to PrEP acceptability and motivations for adherence among MSM  
31 379 and transgender women in New York City. *AIDS patient care and STDs*. 2013;27(4):248-254.  
32 380 13. Shrestha R, Karki P, Altice FL, et al. Measuring Acceptability and Preferences for Implementation  
33 381 of Pre-Exposure Prophylaxis (PrEP) Using Conjoint Analysis: An Application to Primary HIV Prevention  
34 382 Among High Risk Drug Users. *AIDS and Behavior*. 2018-04-01 2018;22(4):1228-1238.  
35 383 doi:10.1007/s10461-017-1851-1  
36 384 14. Patel R, Singh S, Farag C, al. e. Out-of-pocket costs impede PrEP use among young MSM in the  
37 385 private healthcare system. Presented at Conference on Retroviruses and Opportunistic Infections 2018.  
38 386 15. Kay ES, Pinto RM. Is insurance a barrier to HIV preexposure prophylaxis? Clarifying the issue.  
39 387 *American Journal of Public Health*. 2020;110(1):61-64.  
40 388 16. Karletsos D, Stoecker C. Impact of Medicaid Expansion on PrEP Utilization in the US: 2012–2018.  
41 389 *AIDS and Behavior*. 2020:1-9.  
42 390 17. Patel RR, Mena L, Nunn A, et al. Impact of insurance coverage on utilization of pre-exposure  
43 391 prophylaxis for HIV prevention. *PLoS One*. 2017;12(5):e0178737.  
44 392 18. Baugher AR, Finlayson T, Lewis R, et al. Health Care Coverage and Preexposure Prophylaxis  
45 393 (PrEP) Use Among Men Who Have Sex With Men Living in 22 US Cities With Medicaid Expansion, 2017.  
46 394 *American Journal of Public Health*. 2021;(0):e1-e9.  
47 395 19. Grov C, Westmoreland DA, Carneiro PB, et al. Recruiting vulnerable populations to participate in  
48 396 HIV prevention research: findings from the Together 5000 cohort study. *Annals of Epidemiology*. May 16  
49 397 2019;doi:10.1016/j.annepidem.2019.05.003



21

- 1  
2  
3 398 20. Rendina HJ, Talan AJ, Tavella NF, et al. Leveraging Technology to Blend Large-Scale  
4 399 Epidemiologic Surveillance with Social and Behavioral Science Methods: Successes, Challenges, and  
5 400 Lessons Learned Implementing the UNITE Longitudinal Cohort Study of HIV risk factors among Sexual  
6 401 Minority Men in the US. *American Journal of Epidemiology*. 2020;  
7  
8 402 21. Foundation KF. Status of state action on the Medicaid expansion decision. *Kff.org*. 2016;  
9 403 22. Austin PC, Merlo J. Intermediate and advanced topics in multilevel logistic regression analysis.  
10 404 *Statistics in medicine*. 2017;36(20):3257-3277.  
11 405 23. Merlo J, Chaix B, Ohlsson H, et al. A brief conceptual tutorial of multilevel analysis in social  
12 406 epidemiology: using measures of clustering in multilevel logistic regression to investigate contextual  
13 407 phenomena. *Journal of Epidemiology & Community Health*. 2006;60(4):290-297.  
14 408 24. CDC. *HIV Surveillance Report, 2017*. Vol. 29. 2019. November 2018.  
15 409 25. CDC. *Preexposure prophylaxis for the prevention of HIV infection in the United States—2017*  
16 410 *Update: a clinical practice guideline*. 2018.  
17 411 26. CDC. Preexposure Prophylaxis for the Prevention of HIV Infection in the United States—2017  
18 412 Update: A Clinical Practice Guideline. CDC website 2018.  
19 413 27. Golub SA, Myers JE. Next-Wave HIV Pre-Exposure Prophylaxis Implementation for Gay and  
20 414 Bisexual Men. *AIDS patient care and STDs*. 2019;  
21 415 28. Grulich AE, Guy R, Amin J, et al. Population-level effectiveness of rapid, targeted, high-coverage  
22 416 roll-out of HIV pre-exposure prophylaxis in men who have sex with men: the EPIC-NSW prospective  
23 417 cohort study. *The lancet HIV*. 2018;5(11):e629-e637.  
24 418 29. Medland NA, Grulich AE. HIV diagnoses in Australia fall as clinicians embrace pre-exposure  
25 419 prophylaxis. *AN INDEPENDENT REVIEW*. 2020:182.  
26 420 30. Australasian Society of HIV VH, Medicine SH. PrEP guidelines update: prevent HIV by prescribing  
27 421 PrEP. ASHM Sydney; 2019.  
28 422 31. Siegler AJ, Bratcher A, Weiss KM, et al. Location Location Location: An Exploration of Disparities  
29 423 in Access to Publicly Listed PrEP Clinics in the United States. *Annals of Epidemiology*. 2018;

424

425

426

427

428

429

430

431

432

433

**Appendix. State-level (level-2) Medicaid Expansion Status**

| State                | Sample population | Medicaid Expansion Status 2020 |
|----------------------|-------------------|--------------------------------|
| Alabama              | 1,461             | Not expanded                   |
| Alaska               | 204               | Fully expanded                 |
| Arizona              | 2,791             | Conditionally Expanded         |
| Arkansas             | 830               | Conditionally Expanded         |
| California           | 16,723            | Fully expanded                 |
| Colorado             | 2,413             | Fully expanded                 |
| Connecticut          | 1,137             | Fully expanded                 |
| Delaware             | 340               | Fully expanded                 |
| District of Columbia | 1,072             | Fully expanded                 |
| Florida              | 9,654             | Not expanded                   |
| Georgia              | 4,311             | Not expanded                   |
| Hawaii               | 511               | Fully expanded                 |
| Idaho                | 497               | Fully expanded                 |
| Illinois             | 5,079             | Fully expanded                 |
| Indiana              | 2,098             | Conditionally Expanded         |
| Iowa                 | 912               | Conditionally Expanded         |
| Kansas               | 776               | Not expanded                   |
| Kentucky             | 1,432             | Conditionally Expanded         |
| Louisiana            | 1,600             | Fully expanded                 |
| Maine                | 371               | Fully expanded                 |
| Maryland             | 1,944             | Fully expanded                 |
| Massachusetts        | 2,816             | Fully expanded                 |
| Michigan             | 2,745             | Conditionally Expanded         |
| Minnesota            | 1,739             | Fully expanded                 |
| Mississippi          | 744               | Not expanded                   |
| Missouri             | 1,807             | Not expanded                   |
| Montana              | 308               | Fully expanded                 |
| Nebraska             | 594               | Conditionally Expanded         |
| Nevada               | 1,412             | Fully expanded                 |
| New Hampshire        | 413               | Conditionally Expanded         |
| New Jersey           | 2,741             | Fully expanded                 |
| New Mexico           | 822               | Conditionally Expanded         |
| New York             | 11,010            | Fully expanded                 |
| North Carolina       | 3,367             | Not expanded                   |
| North Dakota         | 199               | Fully expanded                 |
| Ohio                 | 3,652             | Conditionally Expanded         |
| Oklahoma             | 1,163             | Not expanded                   |
| Oregon               | 1,659             | Fully expanded                 |
| Pennsylvania         | 4,192             | Fully expanded                 |
| Puerto Rico          | 1,119             | Fully expanded                 |
| Rhode Island         | 432               | Fully expanded                 |
| South Carolina       | 1,504             | Not expanded                   |
| South Dakota         | 192               | Not expanded                   |

|    |               |        |                        |
|----|---------------|--------|------------------------|
| 1  |               |        |                        |
| 2  | Tennessee     | 2,005  | Not expanded           |
| 3  | Texas         | 11,750 | Not expanded           |
| 4  | Utah          | 1,285  | Conditionally Expanded |
| 5  | Vermont       | 193    | Fully expanded         |
| 6  | Virginia      | 2,757  | Fully expanded         |
| 7  | Washington    | 2,812  | Fully expanded         |
| 8  | West Virginia | 511    | Fully expanded         |
| 9  | Wisconsin     | 1,641  | Not expanded           |
| 10 | Wyoming       | 165    | Not expanded           |
| 11 |               |        |                        |
| 12 |               |        |                        |
| 13 |               |        |                        |
| 14 |               |        |                        |
| 15 |               |        |                        |
| 16 |               |        |                        |
| 17 |               |        |                        |
| 18 |               |        |                        |
| 19 |               |        |                        |
| 20 |               |        |                        |
| 21 |               |        |                        |
| 22 |               |        |                        |
| 23 |               |        |                        |
| 24 |               |        |                        |
| 25 |               |        |                        |
| 26 |               |        |                        |
| 27 |               |        |                        |
| 28 |               |        |                        |
| 29 |               |        |                        |
| 30 |               |        |                        |
| 31 |               |        |                        |
| 32 |               |        |                        |
| 33 |               |        |                        |
| 34 |               |        |                        |
| 35 |               |        |                        |
| 36 |               |        |                        |
| 37 |               |        |                        |
| 38 |               |        |                        |
| 39 |               |        |                        |
| 40 |               |        |                        |
| 41 |               |        |                        |
| 42 |               |        |                        |
| 43 |               |        |                        |
| 44 |               |        |                        |
| 45 |               |        |                        |
| 46 |               |        |                        |
| 47 |               |        |                        |
| 48 |               |        |                        |
| 49 |               |        |                        |
| 50 |               |        |                        |
| 51 |               |        |                        |
| 52 |               |        |                        |
| 53 |               |        |                        |
| 54 |               |        |                        |
| 55 |               |        |                        |
| 56 |               |        |                        |
| 57 |               |        |                        |
| 58 |               |        |                        |
| 59 |               |        |                        |
| 60 |               |        |                        |

For peer review only

|    | Age group    |       |       |       | Race/Ethnicity |        |       |
|----|--------------|-------|-------|-------|----------------|--------|-------|
|    | 24 and under | 25-29 | 30-49 | 50+   | Black          | Latino | White |
| 1  |              |       |       |       |                |        |       |
| 2  |              |       |       |       |                |        |       |
| 3  |              |       |       |       |                |        |       |
| 4  |              |       |       |       |                |        |       |
| 5  |              |       |       |       |                |        |       |
| 6  | 446          | 301   | 561   | 153   | 389            | 70     | 884   |
| 7  | 41           | 47    | 90    | 26    | 11             | 13     | 101   |
| 8  | 785          | 602   | 1,048 | 356   | 144            | 773    | 1,352 |
| 9  | 225          | 172   | 318   | 115   | 107            | 52     | 571   |
| 10 |              |       |       |       |                |        |       |
| 11 | 4,454        | 3,662 | 6,605 | 2,002 | 1,181          | 5,435  | 5,912 |
| 12 | 575          | 566   | 995   | 277   | 140            | 468    | 1,407 |
| 13 |              |       |       |       |                |        |       |
| 14 | 309          | 230   | 403   | 195   | 120            | 184    | 675   |
| 15 | 83           | 57    | 138   | 62    | 64             | 34     | 208   |
| 16 | 201          | 262   | 484   | 125   | 208            | 129    | 563   |
| 17 |              |       |       |       |                |        |       |
| 18 | 2,439        | 1,867 | 3,746 | 1,602 | 1,089          | 2,658  | 4,746 |
| 19 | 1,116        | 956   | 1,713 | 526   | 1,233          | 380    | 2,193 |
| 20 | 92           | 91    | 230   | 98    | 12             | 45     | 140   |
| 21 |              |       |       |       |                |        |       |
| 22 | 151          | 110   | 180   | 56    | 1              | 89     | 352   |
| 23 | 1,263        | 1,108 | 2,060 | 648   | 669            | 978    | 2,735 |
| 24 | 632          | 401   | 759   | 306   | 215            | 154    | 1,520 |
| 25 |              |       |       |       |                |        |       |
| 26 | 247          | 66    | 367   | 132   | 46             | 65     | 707   |
| 27 | 242          | 173   | 276   | 85    | 59             | 87     | 519   |
| 28 | 399          | 303   | 562   | 168   | 132            | 62     | 1,129 |
| 29 | 435          | 352   | 667   | 173   | 357            | 132    | 954   |
| 30 |              |       |       |       |                |        |       |
| 31 | 78           | 82    | 141   | 70    | 9              | 16     | 319   |
| 32 | 521          | 423   | 762   | 238   | 448            | 233    | 939   |
| 33 |              |       |       |       |                |        |       |
| 34 | 724          | 612   | 1,052 | 428   | 214            | 407    | 1,671 |
| 35 | 745          | 531   | 1,095 | 374   | 325            | 179    | 1,920 |
| 36 | 450          | 349   | 717   | 223   | 91             | 140    | 1,206 |
| 37 | 203          | 168   | 267   | 106   | 222            | 15     | 461   |
| 38 | 509          | 340   | 703   | 255   | 183            | 90     | 1,367 |
| 39 |              |       |       |       |                |        |       |
| 40 | 85           | 62    | 134   | 27    | 11             | 17     | 236   |
| 41 | 192          | 121   | 194   | 87    | 38             | 72     | 428   |
| 42 | 362          | 287   | 586   | 177   | 136            | 355    | 647   |
| 43 |              |       |       |       |                |        |       |
| 44 | 88           | 62    | 172   | 91    | 15             | 25     | 339   |
| 45 | 730          | 496   | 1,044 | 471   | 330            | 521    | 1,423 |
| 46 | 221          | 173   | 345   | 83    | 17             | 381    | 223   |
| 47 |              |       |       |       |                |        |       |
| 48 | 2,608        | 2,554 | 4,591 | 1,257 | 1,337          | 2,042  | 5,521 |
| 49 | 965          | 732   | 1,279 | 391   | 702            | 331    | 1,940 |
| 50 | 57           | 36    | 83    | 23    | 10             | 10     | 145   |
| 51 | 901          | 780   | 1,455 | 516   | 435            | 168    | 2,670 |
| 52 |              |       |       |       |                |        |       |
| 53 | 314          | 205   | 505   | 139   | 91             | 98     | 697   |
| 54 | 356          | 345   | 750   | 208   | 60             | 226    | 108   |
| 55 | 1,153        | 899   | 1,574 | 566   | 437            | 355    | 2,909 |
| 56 | 285          | 219   | 492   | 123   | 26             | 49     | 292   |
| 57 |              |       |       |       |                |        |       |
| 58 | 106          | 94    | 160   | 72    | 8              | 807    | 28    |
| 59 | 427          | 287   | 566   | 224   | 365            | 95     | 907   |
| 60 | 51           | 43    | 74    | 24    | 7              | 11     | 135   |

|    |       |       |       |       |       |       |       |
|----|-------|-------|-------|-------|-------|-------|-------|
| 1  |       |       |       |       |       |       |       |
| 2  | 514   | 465   | 788   | 238   | 267   | 120   | 1,434 |
| 3  | 3,600 | 2,567 | 4,438 | 1,145 | 1,464 | 4,383 | 4,291 |
| 4  | 363   | 280   | 532   | 110   | 27    | 182   | 888   |
| 5  | 57    | 29    | 77    | 30    | 6     | 16    | 153   |
| 6  | 814   | 601   | 1,005 | 337   | 483   | 308   | 1,539 |
| 7  | 644   | 623   | 1,203 | 342   | 122   | 354   | 170   |
| 8  | 127   | 99    | 211   | 74    | 28    | 11    | 441   |
| 9  | 421   | 349   | 643   | 228   | 145   | 1,453 | 1,179 |
| 10 | 46    | 36    | 64    | 20    | 1     | 21    | 121   |
| 11 |       |       |       |       |       |       |       |
| 12 |       |       |       |       |       |       |       |
| 13 |       |       |       |       |       |       |       |
| 14 |       |       |       |       |       |       |       |
| 15 |       |       |       |       |       |       |       |
| 16 |       |       |       |       |       |       |       |
| 17 |       |       |       |       |       |       |       |
| 18 |       |       |       |       |       |       |       |
| 19 |       |       |       |       |       |       |       |
| 20 |       |       |       |       |       |       |       |
| 21 |       |       |       |       |       |       |       |
| 22 |       |       |       |       |       |       |       |
| 23 |       |       |       |       |       |       |       |
| 24 |       |       |       |       |       |       |       |
| 25 |       |       |       |       |       |       |       |
| 26 |       |       |       |       |       |       |       |
| 27 |       |       |       |       |       |       |       |
| 28 |       |       |       |       |       |       |       |
| 29 |       |       |       |       |       |       |       |
| 30 |       |       |       |       |       |       |       |
| 31 |       |       |       |       |       |       |       |
| 32 |       |       |       |       |       |       |       |
| 33 |       |       |       |       |       |       |       |
| 34 |       |       |       |       |       |       |       |
| 35 |       |       |       |       |       |       |       |
| 36 |       |       |       |       |       |       |       |
| 37 |       |       |       |       |       |       |       |
| 38 |       |       |       |       |       |       |       |
| 39 |       |       |       |       |       |       |       |
| 40 |       |       |       |       |       |       |       |
| 41 |       |       |       |       |       |       |       |
| 42 |       |       |       |       |       |       |       |
| 43 |       |       |       |       |       |       |       |
| 44 |       |       |       |       |       |       |       |
| 45 |       |       |       |       |       |       |       |
| 46 |       |       |       |       |       |       |       |
| 47 |       |       |       |       |       |       |       |
| 48 |       |       |       |       |       |       |       |
| 49 |       |       |       |       |       |       |       |
| 50 |       |       |       |       |       |       |       |
| 51 |       |       |       |       |       |       |       |
| 52 |       |       |       |       |       |       |       |
| 53 |       |       |       |       |       |       |       |
| 54 |       |       |       |       |       |       |       |
| 55 |       |       |       |       |       |       |       |
| 56 |       |       |       |       |       |       |       |
| 57 |       |       |       |       |       |       |       |
| 58 |       |       |       |       |       |       |       |
| 59 |       |       |       |       |       |       |       |
| 60 |       |       |       |       |       |       |       |

For peer review only

| y  | Multiracial | Other |
|----|-------------|-------|
| 6  | 69          | 49    |
| 7  | 40          | 39    |
| 8  | 366         | 156   |
| 9  | 61          | 39    |
| 11 | 2,343       | 1,852 |
| 12 | 289         | 109   |
| 13 | 98          | 60    |
| 15 | 19          | 15    |
| 16 | 80          | 92    |
| 17 | 817         | 344   |
| 18 | 295         | 210   |
| 20 | 123         | 191   |
| 21 | 44          | 11    |
| 22 | 396         | 301   |
| 24 | 140         | 69    |
| 25 | 51          | 43    |
| 26 | 71          | 40    |
| 27 | 77          | 32    |
| 29 | 107         | 50    |
| 30 | 12          | 15    |
| 32 | 194         | 130   |
| 33 | 277         | 247   |
| 34 | 199         | 122   |
| 35 | 147         | 155   |
| 37 | 27          | 19    |
| 38 | 104         | 63    |
| 39 | 19          | 25    |
| 41 | 43          | 13    |
| 42 | 167         | 107   |
| 43 | 26          | 8     |
| 45 | 241         | 223   |
| 46 | 118         | 83    |
| 47 | 1,192       | 918   |
| 48 | 232         | 162   |
| 50 | 14          | 20    |
| 51 | 266         | 113   |
| 52 | 124         | 153   |
| 53 | 196         | 96    |
| 55 | 294         | 197   |
| 56 | 40          | 25    |
| 58 | 262         | 14    |
| 59 | 90          | 47    |
| 60 | 21          | 18    |

|    |       |     |
|----|-------|-----|
| 1  |       |     |
| 2  | 127   | 57  |
| 3  | 1,064 | 548 |
| 4  | 122   | 66  |
| 5  | 8     | 10  |
| 6  |       |     |
| 7  | 248   | 179 |
| 8  | 355   | 261 |
| 9  |       |     |
| 10 | 18    | 13  |
| 11 | 99    | 65  |
| 12 | 13    | 9   |
| 13 | <hr/> |     |
| 14 |       |     |
| 15 |       |     |
| 16 |       |     |
| 17 |       |     |
| 18 |       |     |
| 19 |       |     |
| 20 |       |     |
| 21 |       |     |
| 22 |       |     |
| 23 |       |     |
| 24 |       |     |
| 25 |       |     |
| 26 |       |     |
| 27 |       |     |
| 28 |       |     |
| 29 |       |     |
| 30 |       |     |
| 31 |       |     |
| 32 |       |     |
| 33 |       |     |
| 34 |       |     |
| 35 |       |     |
| 36 |       |     |
| 37 |       |     |
| 38 |       |     |
| 39 |       |     |
| 40 |       |     |
| 41 |       |     |
| 42 |       |     |
| 43 |       |     |
| 44 |       |     |
| 45 |       |     |
| 46 |       |     |
| 47 |       |     |
| 48 |       |     |
| 49 |       |     |
| 50 |       |     |
| 51 |       |     |
| 52 |       |     |
| 53 |       |     |
| 54 |       |     |
| 55 |       |     |
| 56 |       |     |
| 57 |       |     |
| 58 |       |     |
| 59 |       |     |
| 60 |       |     |

For peer review only

1  
2  
3  
4  
5  
6  
7  
8  
9  
10  
11  
12  
13  
14  
15  
16  
17  
18  
19  
20  
21  
22  
23  
24  
25  
26  
27  
28  
29  
30  
31  
32  
33  
34  
35  
36  
37  
38  
39  
40  
41  
42  
43  
44  
45  
46  
47  
48  
49  
50  
51  
52  
53  
54  
55  
56  
57  
58  
59  
60STROBE Statement—Checklist of items that should be included in reports of *cross-sectional studies*

|                              | Item No | Recommendation                                                                                                                                                                       | Page and line number              |
|------------------------------|---------|--------------------------------------------------------------------------------------------------------------------------------------------------------------------------------------|-----------------------------------|
| <b>Title and abstract</b>    | 1       | (a) Indicate the study's design with a commonly used term in the title or the abstract                                                                                               | Page 2 Line 25                    |
|                              |         | (b) Provide in the abstract an informative and balanced summary of what was done and what was found                                                                                  | Page 2 Line 21-40                 |
| <b>Introduction</b>          |         |                                                                                                                                                                                      |                                   |
| Background/rationale         | 2       | Explain the scientific background and rationale for the investigation being reported                                                                                                 | Page 4-5<br>Lines 59-99           |
| Objectives                   | 3       | State specific objectives, including any prespecified hypotheses                                                                                                                     | Page 5 Lines 100 - 105            |
| <b>Methods</b>               |         |                                                                                                                                                                                      |                                   |
| Study design                 | 4       | Present key elements of study design early in the paper                                                                                                                              | Page 6 Lines 108-117              |
| Setting                      | 5       | Describe the setting, locations, and relevant dates, including periods of recruitment, exposure, follow-up, and data collection                                                      | Page 6 Lines 118-125              |
| Participants                 | 6       | (a) Give the eligibility criteria, and the sources and methods of selection of participants                                                                                          | Page 6 Lines 121-124              |
| Variables                    | 7       | Clearly define all outcomes, exposures, predictors, potential confounders, and effect modifiers. Give diagnostic criteria, if applicable                                             | Page 7 Lines 127 - 145            |
| Data sources/<br>measurement | 8*      | For each variable of interest, give sources of data and details of methods of assessment (measurement). Describe comparability of assessment methods if there is more than one group | Page 7 Lines 127 - 145            |
| Bias                         | 9       | Describe any efforts to address potential sources of bias                                                                                                                            | Page 8 Lines 161-165              |
| Study size                   | 10      | Explain how the study size was arrived at                                                                                                                                            | Page 6 Lines 119 -125             |
| Quantitative variables       | 11      | Explain how quantitative variables were handled in the analyses. If applicable, describe which groupings were chosen and why                                                         | Page 8 Lines 154 - 170            |
| Statistical methods          | 12      | (a) Describe all statistical methods, including those used to control for confounding                                                                                                | Page 8 Lines 154 - 170            |
|                              |         | (b) Describe any methods used to examine subgroups and interactions                                                                                                                  | N/A                               |
|                              |         | (c) Explain how missing data were addressed                                                                                                                                          | N/A                               |
|                              |         | (d) If applicable, describe analytical methods taking account of sampling strategy                                                                                                   | N/A                               |
|                              |         | (e) Describe any sensitivity analyses                                                                                                                                                | N/A                               |
| <b>Results</b>               |         |                                                                                                                                                                                      |                                   |
| Participants                 | 13*     | (a) Report numbers of individuals at each stage of study—eg numbers potentially eligible, examined for eligibility, confirmed eligible, included in the study, completing follow-    | Page 6 Lines 121-124 +<br>Table 1 |



|                          |     |                                                                                                                                                                                                              |                                |
|--------------------------|-----|--------------------------------------------------------------------------------------------------------------------------------------------------------------------------------------------------------------|--------------------------------|
|                          |     | up, and analysed                                                                                                                                                                                             |                                |
|                          |     | (b) Give reasons for non-participation at each stage                                                                                                                                                         | N/A                            |
|                          |     | (c) Consider use of a flow diagram                                                                                                                                                                           | N/A                            |
| Descriptive data         | 14* | (a) Give characteristics of study participants (eg demographic, clinical, social) and information on exposures and potential confounders                                                                     | Table 1 Page 9 Lines 172 - 182 |
|                          |     | (b) Indicate number of participants with missing data for each variable of interest                                                                                                                          | Table 1                        |
| Outcome data             | 15* | Report numbers of outcome events or summary measures                                                                                                                                                         | Table2                         |
| Main results             | 16  | (a) Give unadjusted estimates and, if applicable, confounder-adjusted estimates and their precision (eg, 95% confidence interval). Make clear which confounders were adjusted for and why they were included | Page 11 Lines 185- 209         |
|                          |     | (b) Report category boundaries when continuous variables were categorized                                                                                                                                    | N/A                            |
|                          |     | (c) If relevant, consider translating estimates of relative risk into absolute risk for a meaningful time period                                                                                             | N/A                            |
| Other analyses           | 17  | Report other analyses done—eg analyses of subgroups and interactions, and sensitivity analyses                                                                                                               | N/A                            |
| <b>Discussion</b>        |     |                                                                                                                                                                                                              |                                |
| Key results              | 18  | Summarise key results with reference to study objectives                                                                                                                                                     | Page 13 Lines 212 -220         |
| Limitations              | 19  | Discuss limitations of the study, taking into account sources of potential bias or imprecision. Discuss both direction and magnitude of any potential bias                                                   | Page 16 Lines 279 - 297        |
| Interpretation           | 20  | Give a cautious overall interpretation of results considering objectives, limitations, multiplicity of analyses, results from similar studies, and other relevant evidence                                   | Page 13,14,15 Lines 221 - 277  |
| Generalisability         | 21  | Discuss the generalisability (external validity) of the study results                                                                                                                                        | Page 16 Lines 279 – 285        |
| <b>Other information</b> |     |                                                                                                                                                                                                              |                                |
| Funding                  | 22  | Give the source of funding and the role of the funders for the present study and, if applicable, for the original study on which the present article is based                                                | Page 18 Line 329 - 332         |

\*Give information separately for exposed and unexposed groups.

**Note:** An Explanation and Elaboration article discusses each checklist item and gives methodological background and published examples of transparent reporting. The STROBE checklist is best used in conjunction with this article (freely available on the Web sites of PLoS Medicine at <http://www.plosmedicine.org/>, Annals of Internal Medicine at <http://www.annals.org/>, and Epidemiology at <http://www.epidem.com/>). Information on the STROBE Initiative is available at [www.strobe-statement.org](http://www.strobe-statement.org).
